1 **Functional Mature Human Microglia Developed in Human iPSC Microglial Chimeric Mouse Brain**

2  
3 Ranjie Xu <sup>1</sup>, Andrew J. Boreland <sup>1</sup>, Xiaoxi Li <sup>1</sup>, Anthony Posyton<sup>1</sup>, Kelvin Kwan<sup>1</sup>, Ronald P. Hart<sup>1</sup>, Peng  
4 Jiang<sup>1,\*</sup>

5  
6 <sup>1</sup>Department of Cell Biology and Neuroscience, Rutgers University, Piscataway, NJ 08854, USA.  
7  
8  
9

10  
11  
12  
13  
14  
15  
16  
17  
18  
19 \*Address correspondence to:

20 Peng Jiang, Ph.D.

21 Assistant Professor

22 Department of Cell Biology and Neuroscience

23 Rutgers University

24 604 Allison Road, Piscataway, NJ 08854

25 Email: peng.jiang@rutgers.edu

26 Phone: 848-445-2805

1 **Abstract**

2  
3 Microglia, the brain-resident macrophages, exhibit highly dynamic functions in neurodevelopment and  
4 neurodegeneration. Human microglia possess unique features as compared to mouse microglia, but  
5 our understanding of human microglial functions is largely limited by an inability to obtain human  
6 microglia under homeostatic states. We developed a human pluripotent stem cell (hPSC)-based  
7 microglial chimeric mouse brain model by transplanting hPSC-derived primitive macrophage precursors  
8 into neonatal mouse brains. The engrafted human microglia widely disperse in the brain and replace  
9 mouse microglia in corpus callosum at 6 months post-transplantation. Single-cell RNA-sequencing of  
10 the microglial chimeric mouse brains reveals that xenografted hPSC-derived microglia largely retain  
11 human microglial identity, as they exhibit signature gene expression patterns consistent with  
12 physiological human microglia and recapitulate heterogeneity of adult human microglia. Importantly, the  
13 engrafted hPSC-derived microglia exhibit dynamic response to cuprizone-induced demyelination and  
14 species-specific transcriptomic differences in the expression of neurological disease-risk genes in  
15 microglia. This model will serve as a novel tool to study the role of human microglia in brain  
16 development and degeneration.  
17  
18

## 1 Introduction

2  
3 As the resident macrophages of the central nervous system (CNS), microglia play critical roles in  
4 maintenance of CNS homeostasis and regulation of a broad range of neuronal responses<sup>1,2</sup>. Recent  
5 studies indicate that dysfunction of microglia contributes to neurodevelopmental and neurodegenerative  
6 diseases, including Alzheimer's disease (AD)<sup>3-7</sup>. Moreover, genome-wide association studies have  
7 shown that many neurological disease risk genes, particularly neurodegenerative diseases, are highly  
8 and sometimes exclusively expressed by microglia<sup>8-10</sup>. These observations provide a compelling  
9 incentive to investigate the role of microglia in models of abnormal brain development and  
10 neurodegeneration. Most studies of microglia largely rely on rodent microglia. However, there is  
11 increasing evidence that rodent microglia are not able to faithfully mirror the biology of human microglia  
12<sup>11</sup>. In particular, recent transcriptomic studies have clearly demonstrated that a number of immune  
13 genes, not identified as part of the mouse microglial signature, were abundantly expressed in human  
14 microglia<sup>8,12</sup>. Moreover, a limited overlap was observed in microglial genes regulated during aging and  
15 neurodegeneration between mice and humans, indicating that human and mouse microglia age  
16 differently under normal and diseased conditions<sup>12,13</sup>. These findings argue for the development of  
17 species-specific research tools to investigate microglial functions in human brain development, aging,  
18 and neurodegeneration.

19 Functional human brain tissue is scarcely available. In addition, given the considerable  
20 sensitivity of microglia to environmental changes<sup>8</sup>, the properties of available human microglia isolated  
21 from surgically resected brain tissue may vary significantly, due to different disease states of the  
22 patients and the multi-step procedures used for microglial purification. In order to study human  
23 microglia in a relatively homeostatic state, many scientists have turned to human pluripotent stem cells  
24 (hPSCs). Recent advances in stem cell technology have led to the efficient generation of microglia from  
25 hPSCs<sup>14-19</sup>, providing an unlimited source of human microglia to study their function. However, when  
26 cultured alone or co-cultured with neurons and astrocytes in 2-dimensional (2D) or 3D  
27 organoid/spheroid culture systems, these hPSC-derived microglia best resemble fetal or early postnatal  
28 human microglia. This is indicated by much lower expression of key microglial molecules such as  
29 TREM2, TMEM119, and P2RY12 in the hPSC-derived microglia, as compared to microglia derived  
30 from adult human brain tissue<sup>16,18,20</sup>. Thus, even with these novel *in vitro* models, it has been  
31 challenging to advance understanding of human microglial function in adult ages or in  
32 neurodegeneration during aging.

33 Recent studies from us<sup>21,22</sup> and others<sup>23-25</sup> have demonstrated that neonatally engrafted  
34 human neural or macroglial (oligodendroglial and astroglial) progenitor cells can largely repopulate and  
35 functionally integrate into the adult host rodent brain or spinal cord, generating widespread chimerism.  
36 This human-mouse chimeric approach provides unique opportunities for studying the pathophysiology  
37 of the human cells within an intact brain. In this study, we developed a hPSC microglial chimeric mouse  
38 brain model, by transplanting hPSC-derived microglia into neonatal mouse brains. The engrafted  
39 hPSC-derived microglia can proliferate, migrate, and widely disperse in the brain. We hypothesize that  
40 the limited functional maturation of hPSC-derived microglia in *in vitro* models is primarily caused by the  
41 fact that those microglia are maintained in an environment that lacks the complex cell-cell/cell-matrix  
42 interactions existing in an *in vivo* brain environment<sup>8</sup>. To test this hypothesis, we employed single-cell  
43 RNA-sequencing and super-resolution confocal imaging to examine the identity and function of hPSC-  
44 derived microglia developed for six months in the mouse brain under both homeostatic and toxin-  
45 induced demyelination conditions.

## 1 Results

### 2 3 **Generation of hPSC microglial chimeric mouse brains**

4 Microglia originate from yolk sac erythromyeloid progenitors (EMPs) during primitive hematopoiesis.  
5 EMPs further develop to primitive macrophage precursors (PMPs) that migrate into the developing neural  
6 tube and become microglia with ramified processes within the CNS environment<sup>1</sup>. We first derived PMPs  
7 from hPSCs, including one human induced pluripotent stem cell (hiPSC) line and one human embryonic  
8 stem cell (hESC) line, using a published protocol<sup>18</sup>. Briefly, the yolk sac embryoid bodies (YS-EBs) were  
9 generated by treating the EBs with bone morphogenetic protein 4 (BMP4), vascular endothelial growth  
10 factor (VEGF), and stem cell factor (SCF). Next, the YS-EBs were plated into dishes with interleukin-3  
11 (IL-3) and macrophage colony-stimulating factor (M-CSF) to promote myeloid differentiation. At 2–3  
12 weeks after plating, hPSC-derived PMPs emerged into the supernatant and were continuously produced  
13 for more than 3 months. The cumulative yield of PMPs was around 40-fold higher than the number of  
14 input hPSCs (Figure 1A), similar to the results from previous studies<sup>16, 18, 26</sup>. PMPs are produced in a  
15 Myb-independent manner that closely recapitulated primitive hematopoiesis<sup>1, 18, 27</sup>. We confirmed the  
16 identity of these hPSC-derived PMPs by staining with CD235, a marker for YS primitive hematopoietic  
17 progenitors<sup>28, 29</sup>, and CD43, a marker for hematopoietic progenitor-like cells<sup>28, 29</sup>. As shown in Figure 1B,  
18 over 95% of the hPSC-derived PMPs expressed both markers. Moreover, the human PMPs are highly  
19 proliferative as indicated by Ki67 staining ( $95.4 \pm 2.2\%$ ,  $n = 4$ ) (Figure 1B). Using this method, we routinely  
20 obtain ample numbers of hPSC-derived PMPs with high purity as required for cell transplantation  
21 experiments.

22 We engrafted hPSC-derived PMPs into the brains of postnatal day 0 (P0) immunodeficient mice  
23 that are Rag2/IL2 $\gamma$ -deficient and also express the human forms of CSF1, which facilitates the survival  
24 of xenografted human myeloid cells and other leukocytes<sup>30, 31</sup>. We deposited cells into the white matter  
25 overlying the hippocampus and sites within the hippocampal formation (Figure 1C). In order to visualize  
26 the distribution of donor-derived microglia, at 6 months post-transplantation, we stained the mouse  
27 brain sections with human-specific antibody recognizing TMEM119 (hTMEM119). TMEM119 is a  
28 marker that is only expressed by microglia, but not other macrophages<sup>14, 17, 32</sup>. We found that the  
29 donor-derived hTMEM119<sup>+</sup> microglia widely disperse in the brain (Figure 1D). As early as 3 weeks  
30 post-transplantation, donor-derived microglia had already migrated along corpus callosum and passed  
31 through the rostral migratory stream to the olfactory bulb (Figure 1E). At 6 months post-transplantation,  
32 human microglia widely dispersed in multiple brain regions, including olfactory bulb, hippocampus, and  
33 cerebral cortex, and exhibited a highly ramified morphology (Figure 1F and G). Frequently, we also  
34 observed clusters of human microglia in the cerebellum (Figure 1H), which might be a result from the  
35 strong ability of immune cells trafficking along blood vessels and/or the choroid plexus<sup>33</sup>. Similar to our  
36 previous studies<sup>24, 25</sup>, we assessed the engraftment efficiency and degree of chimerization by  
37 quantifying the percentage of hTMEM119<sup>+</sup> cells among total DAPI<sup>+</sup> cells in the forebrain in sagittal brain  
38 sections covering regions from 0.3 to 2.4 mm lateral to midline and found that about 8% of the total  
39 cells were human microglia in the 6-month-old mouse brains (Figure 1D and L). As shown by individual  
40 data points overlaid on the bar graphs (Figure 1L), there were variations in chimerization among  
41 animals. In addition to the images showing distribution of donor-derived cells in Figure 1D, we thus also  
42 included tile scan images collected from another chimeric mouse brain that represents the lower level  
43 of chimerization (supplementary Figure 1A). In the developing brain, microglia are known to use white  
44 matter tracts as guiding structures for migration and that they enter different brain regions<sup>34</sup>. In order to  
45 examine the migration pattern of our transplanted cells, we deposited PMPs into different sites, the  
46 lateral ventricles of P0 mice. As early as three weeks post-transplantation, we found that the majority of  
47 donor-derived cells migrated along the anterior corpus callosum, rostral migration stream, and then  
48 entered the olfactory bulb. Moreover, some of those cells of migrated posteriorly along the corpus  
49 callosum (supplementary Figure 1B), suggesting that engrafted cells likely used corpus callosum to  
50 migrate to various brain regions. These results demonstrate that hPSC-derived PMPs survive in mouse  
51 brain and that they migrate to a variety of structures.

1 To examine whether transplanted hPSC-derived PMPs efficiently differentiated to microglia in  
2 the mouse brain, we double-stained brain sections for both human nuclei (hN) and hTMEM119. As  
3 early as 8 weeks post-transplantation, the vast majority of hN<sup>+</sup> donor-derived cells ( $93.2 \pm 2.2\%$ ,  $n = 7$ )  
4 were positive for hTMEM119 (Figure 1I and M), indicating the robust and efficient differentiation of  
5 hPSC-derived PMPs into microglia. Moreover, the vast majority of the donor-derived cells expressed  
6 PU.1, a transcription factor that is necessary for microglial differentiation and maintenance<sup>35-38</sup>, and  
7 were positive for human specific CD45 (hCD45), which is expressed by all nucleated hematopoietic  
8 cells (Figure 1J)<sup>39, 40</sup>. Similarly, at 6 months post-transplantation, the vast majority of donor-derived  
9 cells expressed hTMEM119 (supplementary Figure 2A) and P2RY12 ( $93.4 \pm 3.8\%$ ,  $n = 7$ ;  
10 supplementary Figure 2B and C). hTMEM119 and P2RY12 was not expressed in PMP cultures  
11 (supplementary Figure 2D). Moreover, we examined the distribution of human donor cells in border  
12 regions, including choroid plexus, meninges, and perivascular spaces. We found that most of the  
13 hTMEM119<sup>+</sup>/hN<sup>+</sup> donor-derived cells were seen in those border regions. Furthermore, we co-stained  
14 hTMEM119 with CD163, an established marker for non-microglial CNS myeloid cells<sup>41, 42</sup>. In choroid  
15 plexus, we found that some of the hTMEM119<sup>+</sup> cells co-expressed CD163, suggesting that these  
16 transplanted cells differentiated into choroid plexus macrophage (cpMΦ), but not microglia  
17 (supplementary Figure 3A). In order to better visualize meninges and perivascular space, we triple-  
18 stained hN and CD163 with laminin, a marker that has been commonly used to visualize vascular  
19 structures in the mammalian brain<sup>43</sup>. There was also a small number of hN<sup>+</sup> and CD163<sup>+</sup> co-expressing  
20 cells in these regions, indicating that the transplanted cells differentiated into meningeal macrophage  
21 (mMΦ) and perivascular macrophages (pvMΦ) (supplementary Figure 3B and C). There was a  
22 possibility that some transplanted cells might remain as progenitors and maintain their hematopoietic  
23 progenitor-like cell identity. As shown in supplementary Figure 3D, we found that a small population of  
24 hN<sup>+</sup> cells expressed CD235 in the regions close to the lateral ventricles. Overall, these results  
25 demonstrate that the vast majority of engrafted hiPSC-derived PMPs differentiate into hTMEM119<sup>+</sup>  
26 microglia, with a relatively small number giving rise to other of hTMEM119<sup>+</sup> CNS myeloid cells in a brain  
27 context-dependent manner or remaining as progenitors.

28 We next assessed the proliferation of engrafted cells by staining the proliferative marker Ki67.  
29 As shown in Figure 1K and N, at 3 weeks post-transplantation, about 17% ( $16.9 \pm 5.7\%$ ,  $n = 8$ ) of hN<sup>+</sup>  
30 transplanted cells expressed Ki67, indicating that these cells were capable of proliferating in the mouse  
31 brain. At 6 months post-transplantation, the percentage of proliferating cells dramatically decreased and  
32 less than 2% ( $1.7 \pm 0.8\%$ ,  $n = 7$ ) of total engrafted cells were Ki67 positive. These Ki67<sup>+</sup> proliferating  
33 human cells mainly localized in the subventricular zone, the walls along lateral ventricles, corpus  
34 callosum, and olfactory bulb (Figure 1K and supplementary Figure 3E). We also examined the  
35 proliferation of mouse host microglia at different brain regions at 3 weeks post-transplantation. We only  
36 found a very small number of Ki67<sup>+</sup> mouse microglia in the subventricular zone (supplementary Figure  
37 3F), which is consistent with a previous report<sup>44</sup>. Taken together, these findings demonstrate that  
38 engrafted hPSC-derived PMPs differentiate to microglia, generating a mouse brain with a high degree of  
39 human microglial chimerism in the forebrain.

## 41 **Human PSC-derived microglia undergo morphological maturation and are functional in the mouse** 42 **brain**

43 Compared with three weeks post-transplantation, hPSCs-derived microglia appeared to exhibit more  
44 complex processes at 6 months post-transplantation (Figure 1E and F). Moreover, even at the same  
45 stage, hPSC-derived microglia in the cerebral cortex seemed to exhibit much more complex  
46 morphology, compared with the hPSCs-derived microglia in the corpus callosum and cerebellum  
47 (Figure 1G and H and hTMEM119 and Iba1 staining in supplementary Figure 2A and 4, respectively).  
48 In the corpus callosum, hPSC-derived microglia had fewer branches that aligned with axons; and in the  
49 cerebral cortex, the microglia exhibited more complex and ramified processes (supplementary Figure  
50 2A and 4), similar to observations from previous studies<sup>34, 45</sup>. This prompted us to further examine the  
51 morphological and functional changes of the hPSC-derived microglia along with the development of the

1 mouse brain, particularly in cerebral cortex. Previous studies have shown that there are no changes in  
2 microglial number, cytokine levels, and gene expression profiles between wild type and *Rag2<sup>-/-</sup>* mice<sup>46</sup>.  
3 Building upon that, we also compared the differences between xenografted hPSC-derived microglia vs.  
4 host mouse microglia. We double-stained the brain sections with human and mouse specific TMEM119  
5 (hTMEM119 and mTMEM119, respectively) antibodies to distinguish hPSC-derived microglia and  
6 mouse host microglia (Figure 2 A and B). As shown in Figure 2A, in 6 month old mice, both hPSCs-  
7 derived microglia and mouse microglia were seen in the cerebral cortex and hippocampus. Notably, we  
8 observed that mouse microglia mainly resided in distal regions in the cerebral cortex and hippocampus.  
9 In particular, in the corpus callosum, mouse microglia were rarely seen, and the vast majority of  
10 microglia were hPSC-derived microglia (Figure 2C), indicating that hPSC-derived microglia replaced  
11 the host mouse microglia. In the cerebral cortex, hTMEM119<sup>+</sup> hPSC-derived microglia exhibited much  
12 more complex processes at 8 weeks and 6 months post-transplantation than those cells at 3 weeks  
13 post-transplantation, as indicated by the increased number of endpoints (Figure 2D). The total length of  
14 processes of hPSC-derived microglia also significantly increased from week 3 to week 8 and month 6  
15 (Figure 2E), suggesting the gradual maturation of hPSC-derived microglia in mouse brain. We further  
16 examined the morphological differences between hPSC-derived microglia vs. mouse microglia at the  
17 same time points after transplantation. In the cerebral cortex, at 3 weeks post transplantation,  
18 compared with hPSC-derived microglia, mouse microglia showed a significantly higher number of  
19 endpoints and a slight trend of longer processes (Figure 2D and E). However, at 8 weeks post-  
20 transplantation, there was no significant difference in endpoint number and process length between  
21 hPSC-derived microglia and mouse microglia (Figure 2D and E). Interestingly, at 6 months post-  
22 transplantation, hPSC-derived microglia exhibited a significantly higher number of endpoints and longer  
23 process length than mouse microglia. Since microglial morphology is inextricably linked to their  
24 phagocytic functions<sup>47,48</sup>, we examined the expression of CD68, a marker for the phagolysosome<sup>49,50</sup>.  
25 In the cerebral cortex, CD68 was expressed in some of the hPSC-derived microglia at 3 weeks post-  
26 transplantation and its expression dramatically decreased from 8 weeks to 6 months post-  
27 transplantation (Figure 2F and G). We observed some hTMEM119/CD68<sup>+</sup> cells at 3 weeks and nearly  
28 no hTMEM119/CD68<sup>+</sup> cells at 6 months post-transplantation (Figure 2G), suggesting that nearly no  
29 host mouse microglia expressed CD68 at 6 months post-transplantation. Taken together, hPSC-derived  
30 microglia show variable morphologies in a spatiotemporal manner and morphologically differ from the  
31 host mouse microglia.

32 Microglia have been shown to shape synapse formation by pruning synapses and to maintain  
33 oligodendroglial homeostasis by phagocytizing oligodendroglial cells<sup>51-53</sup>. We therefore investigated  
34 whether hPSCs-derived microglia are functional in the mouse brain. To examine synaptic pruning  
35 function, we employed a super-resolution imaging technique to visualize synapse engulfment by  
36 hPSCs-derived microglia. We triple-stained hTMEM119 with both a post-synaptic marker PSD95 and a  
37 pre-synaptic marker synapsin I. The 3D reconstruction images show that PSD95<sup>+</sup> and synapsin I<sup>+</sup>  
38 puncta are colocalized within hTMEM119<sup>+</sup> processes, indicating that these synaptic proteins are  
39 phagocytosed by hPSCs-derived microglia at eight weeks post-transplantation in grey matter (Figure  
40 3A). In addition, we also validated the specificity of PSD95 puncta staining by incubating brain sections  
41 with the PSD95 antibody together with a PSD95 peptide. We barely detected any PSD95<sup>+</sup> puncta  
42 signal after the incubation in the presence of PSD95 peptide (supplementary Figure 5A). We also triple-  
43 staining hTMEM119 and PSD95 with CD68. As shown in Figure 3B and supplementary Figures 5B, 5C,  
44 PSD95<sup>+</sup> puncta are localized within CD68<sup>+</sup> phagolysosomes in hTMEM119<sup>+</sup> hPSCs-derived microglia,  
45 further indicating their synaptic pruning function. Of note, this engulfment of synaptic materials was  
46 observed from 3 weeks to 6 months post-transplantation, with a peak at 8 weeks post-transplantation  
47 (Figure 3C). Very few mouse microglia were found to engulf synaptic proteins at 8 weeks post-  
48 transplantation (supplementary Figure 6A). To examine the function of phagocytosing oligodendroglia,  
49 we double-stained hCD45 with PDGFR $\alpha$ , a marker for oligodendroglial progenitor cell. We observed  
50 that hCD45<sup>+</sup> human microglia were able to engulf PDGFR $\alpha$ <sup>+</sup> oligodendroglia at 3 weeks post-  
51 transplantation in the corpus callosum (Figure 3D). We also double stained hCD45 with the

1 oligodendroglial marker OLIG2 and similarly found that hPSCs-derived microglia in white matter  
2 engulfed OLIG2<sup>+</sup> oligodendroglia at 3 weeks post-transplantation (supplementary Figure 6B). In  
3 addition, we detected that a small population of mouse microglia engulfed OLIG2<sup>+</sup> oligodendroglia in  
4 the corpus callosum at 3 weeks post-transplantation (supplementary Figure 6C).

5 Microglia, together with endothelial cells, pericytes and astrocytes, form the functional blood–  
6 brain barrier<sup>54-56</sup>. We double-stained brain sections with hCD45 and laminin. We found that hPSC-  
7 derived microglia clustered around and were closely affiliated with laminin<sup>+</sup> blood vessels in both grey  
8 matter and white matter across different brain regions including the olfactory bulb (Figure 3E and  
9 supplementary Figure 6D). In addition, we also found that mouse microglia similarly had close contact  
10 with blood vessels in the cerebral cortex, corpus callosum, and olfactory bulb (supplementary Figure  
11 6E). Altogether, these results demonstrate hPSCs-derived are functional in the mouse brain under  
12 homeostatic conditions. The human microglia and host mouse microglia exhibited similar microglial  
13 functions, including synaptic pruning, phagocytosis of oligodendroglia, and having contact with blood  
14 vessels.

### 15 16 **Single-cell RNA-sequencing of hiPSC microglial chimeric mouse brain identifies a gene 17 expression signature consistent with adult human microglia**

18 Homeostatic human microglia at adult stages are difficult to obtain, because microglia are highly  
19 sensitive to environmental changes and microglia derived from adult human brain tissue-derived are  
20 usually purified through multi-step procedures that can change their biological properties significantly<sup>8</sup>.  
21 In addition, microglia derived from hPSCs using all current differentiation protocols largely resemble  
22 fetal or early postnatal human microglia<sup>16, 18, 20</sup>. We hypothesize that hPSC microglial chimeric mice  
23 may provide a unique opportunity to study biological properties of adult human microglia, because the  
24 engrafted hPSC-derived microglia are likely to exhibit an expedited maturation process promoted by the  
25 maturing environment in the mouse brain. To test this hypothesis, we examined transcriptomic profiles  
26 of hiPSC-derived microglia, developed in the *in vivo* homeostatic mouse environment, using single-cell  
27 RNA-sequencing (scRNA-seq). We collected brain regions where engrafted hiPSCs-derived microglia  
28 preferentially dispersed, including the cerebral cortex, hippocampus, corpus callosum, and olfactory  
29 bulb, from 6-month-old chimeric mouse brain for scRNA-seq. A previous study has demonstrated that  
30 within hours during which microglia are isolated from the brain environment and transferred to culture  
31 conditions, microglia undergo significant changes in gene expression<sup>8</sup>. To capture observed  
32 expression patterns as close to the “in vivo” patterns as possible, we chose to omit a FACS sorting step  
33 since it would have added substantial processing time. Owing to the wide distribution and high  
34 abundance of hiPSC-derived microglia in those brain regions, we were able to capture ample numbers  
35 of hiPSC-derived microglia for scRNA-seq even without enrichment by FACS sorting. After brain tissue  
36 dissociation with papain and centrifugation to remove debris and myelin, single cell suspensions were  
37 directly subjected to droplet-based 10X Genomic RNA-seq isolation (Fig. 4A). Using stringent criteria,  
38 29,974 cells passed the quality control evaluation (with about 10,000–15,000 reads/cell) from 4 animals  
39 for downstream analysis (supplementary Figure 7A).

40 We performed dimensionality reduction and clustering using a principal component analysis  
41 (PCA)-based approach. Using t-distributed stochastic neighbor embedding (t-SNE) to visualize cell  
42 clustering, we identified 11 clusters, including a cluster of xenografted hiPSC-derived microglia, which  
43 we named Xenografted MG (Fig. 4B). This clustering pattern was consistently and independently obtained in  
44 all four animals, indicating the reproducibility of the sequencing and clustering procedures  
45 (supplementary Figure 7B). We defined each cluster based on the expression of enriched genes (Table  
46 S1) that could be recognized as markers for specific cell types or are reported to be abundantly  
47 expressed in specific cell types (Figure 4C and supplementary Figure 7C). The clusters included 10  
48 mouse cell types: astrocytes (*SCL6A11*<sup>57</sup>, *NTSR2*<sup>58</sup>), oligodendrocytes (*CLDN11*<sup>59</sup>, *CNP*<sup>60</sup>),  
49 oligodendrocyte progenitor cells (OPC; *PDGFR $\alpha$* , *OLIG2*<sup>61</sup>), excitatory neurons (*SYT1*<sup>62</sup>, *SNAP25*<sup>63</sup>),  
50 neuronal precursors (*SOX11*,<sup>64</sup> *STMN2*,<sup>65</sup>), vascular cells (*MYL9*<sup>66</sup>, *MGP*<sup>67</sup>), choroid cells  
51 (*LCN2*<sup>68</sup>, *1500015O10Rik*<sup>69</sup>), endothelial cells (*ITM2A*<sup>70</sup>, *FLT1*<sup>71</sup>), GABAergic neuron (*NPY*<sup>72</sup>, *NR2F2*<sup>73</sup>)

1 and mouse microglia (*P2RY12*, *C1QA*, and *CX3CR1*). The only human cell cluster, labeled Xeno MG,  
2 similarly expressed the microglial markers *P2RY12*, *C1QA*, and *CX3CR1*, and accounted for about 7%  
3 of total cells in our selected dissected regions (supplementary Figure 7D). Of note, a cross-correlation  
4 analysis of clustered cell types showed that Xeno MG had a highest correlation coefficient value (0.776)  
5 with mouse microglia, consistent with a microglial identity of the engrafted human cells (supplementary  
6 Figure 7E). Furthermore, the expression of a set of canonical microglial genes (*C1QA*, *CX3CR*,  
7 *TREM2*, *CSF1R*, and *P2RY12*) was only detected in Xeno MG and mouse microglia clusters (Figure  
8 4D). Moreover, we performed bulk RNA-seq to analyze the pre-engraftment hiPSC-derived PMPs. We  
9 compared transcriptomic profiles between PMPs and Xeno MG from 6 months old chimeric mice.  
10 Notably, as shown in Figure 4E, compared with PMPs, Xeno MG highly expressed microglial identity  
11 markers, such as *TMEM119*, *P2RY12*, *SALL1*, and *OLFML3*, which were barely detected in PMPs. On  
12 the other hand, the expression of markers for hematopoietic progenitor cells, such as *CD59*, *CD44*, and  
13 *CD38*, was low in Xeno MG but much higher in PMPs. Furthermore, we compared the transcriptomic  
14 profile of Xeno MG with a published dataset generated from human brain tissue-derived human  
15 microglia<sup>12</sup>. A significant correlation was observed between Xeno MG and the published dataset<sup>12</sup>  
16 (supplementary Figure 8A), further confirming the human microglial identity of the engrafted human  
17 cells. As shown in Figures 1 and 2, the highly ramified morphology of hiPSC-derived microglia suggest  
18 that they stay at a homeostatic state. We examined expression of several pro-inflammatory cytokines to  
19 assess the impact of the tissue preparation procedures on the microglial state. Consistently, we found  
20 very minor expression of acute pro-inflammatory cytokines such as IL-1 $\beta$ , IL-1 $\alpha$  and TNF- $\alpha$ <sup>74, 75, 76</sup>  
21 (supplementary Figure 8B). In contrast, the pro-inflammatory cytokine, IL-6 and an anti-inflammatory  
22 cytokine, IL-10, were nearly undetectable, and expression of these pro-inflammatory cytokines is often  
23 correlated with a longer-lasting inflammatory response<sup>75, 76</sup>. This observation suggests that only a very  
24 mild inflammatory reaction was likely triggered in the Xeno MG during sample preparation, similar to  
25 previous reports<sup>53, 74</sup>. These results demonstrate that Xeno MG developed in the mouse brain largely  
26 retain their human microglial identity and exhibit a gene expression pattern characteristic of  
27 homeostatic human microglia.

28 Next, to further evaluate identity and maturation of Xeno MG in chimeric mouse brains, we  
29 compared the global expression patterns of 21 genes including the 11 microglia-specific genes and 7  
30 HPC-specific genes shown in Figure 4E, as well as 3 NPC genes (*NES*, *DCX*, and *SOX2*) between our  
31 Xeno MG, hiPSC-derived PMPs and published datasets of hiPSC-derived microglia cultured under 2-  
32 dimensional (2D) conditions (iPS MG)<sup>17, 77</sup>, hiPSC-derived microglia developed in 3D cerebral  
33 organoids (oMG)<sup>78</sup>, hiPSC-derived microglia developed in mouse brain (xMG) as reported in a recent  
34 study<sup>12, 78</sup>. brain-tissue derived adult human microglia, including adult ex vivo microglia (Adult MG  
35 ExVivo) from Gosselin et al., 2017<sup>17, 77</sup> (age from 13-17 years) and Galatro et al., 2017 (age from 34-102  
36 years)<sup>17, 77</sup>, in vitro microglia (MG InVitro) from Gosselin et al., 2017<sup>17, 77</sup>, as well as blood/liver  
37 macrophages<sup>17, 77</sup>. As shown in Figure 4F, a principal component analysis (PCA) demonstrated that  
38 Xeno MG, together with xMG, were markedly distinct from blood/liver macrophages, PMPs, and the  
39 hiPSC-derived MG cultured under 2D conditions or developed in organoids. The human microglia  
40 cultured *in vitro* were separate from the other two clusters, which might suggest the significant impact of  
41 culture conditions on gene expression in those microglia as previously reported<sup>8</sup>. Our Xeno MG  
42 clusters intermingled with a cluster of adult MG, suggesting their resemblance to adult human microglia.  
43 Recent unbiased hierarchical clustering analyses revealed four major subclasses of adult human  
44 microglia derived from human brain tissue<sup>79</sup>. To determine if Xeno MG also exhibited similar  
45 heterogeneity in chimeric mouse brain, we examined the expression of the most differentially regulated  
46 genes identified from the different subclasses of adult human microglia<sup>79</sup>. Gene expression analysis  
47 revealed that *CD74*, *SPP1*, *C3*, and *CST3*, which were highly expressed in all subclasses in adult  
48 human microglia, had a similarly uniform pattern of expression among most Xeno MG cells. Moreover,  
49 a chemokine gene *CCL4*, the zinc finger transcription factors *EGR1*, *EGR2* and *EGR3*, *CD83*, and  
50 *MCL1*, which are each characteristically expressed in individual subclasses of human microglia,  
51 similarly had upregulated expression in distinct subpopulations of Xeno MG (Figure 4G and



1 supplementary Figure 8C). Taken together, these results demonstrate that Xeno MG developed in the  
2 mouse brain highly resemble mature human microglia and faithfully recapitulate heterogeneity of adult  
3 human microglia.

#### 4 5 **Transcriptomic profiling analysis reveals differences between co-resident Xeno MG and mouse** 6 **microglia**

7 Previous studies reported differences in transcriptomic profiles between human and mouse microglia<sup>8</sup>  
8<sup>12</sup>. In the chimeric mouse brain, as xenografted hiPSC-derived microglia and host mouse microglia  
9 developed in the same brain environment, this model may provide a unique opportunity to directly  
10 examine the differences between human and mouse microglia. Xeno MG and host mouse microglia  
11 clusters obtained from 4 independent samples of 6-month-old chimeric mouse brains were used for the  
12 following comparison (Figure 5). We first compared the average levels of microglial gene transcripts in  
13 Xeno MG with orthologous gene transcripts in host mouse microglia. Consistent with previous findings  
14<sup>8, 12</sup>, the comparison between Xeno MG and mouse microglial transcriptomes demonstrated similar  
15 gene expression patterns overall ( $r^2 = 0.553$ ;  $p < 2.2 \times 10^{-16}$ ), and the majority of orthologous genes  
16 pairs (14,488 of 15,058; 96.2%) were expressed within a twofold range (black dots, Figure 5B). Using a  
17 cut-off of 2-fold difference and an FDR of 0.05, we identified that 91 gene transcripts were preferentially  
18 expressed in human microglia, whereas 84 gene transcripts were preferentially expressed in mouse  
19 microglia (supplementary Figure 8D and Table S2). Importantly, previously-reported signature genes  
20 expressed in human microglia<sup>8</sup>, including *SPPI*, *A2M*, and *C3*, and signature genes expressed in  
21 mouse microglia, including *HEXB*, *SPARC*, and *SERINC3*, were all differentially expressed in our  
22 sequencing data (Figure 5B and C), indicating the high fidelity of our samples in resembling previously-  
23 identified human vs. mouse microglial gene expression profiles. To explore the function of genes that  
24 were highly expressed human microglia, we further performed Gene Ontology (GO) term analysis.  
25 Many significantly enriched terms were associated with the innate immune activity of microglia, such as  
26 “immune system response,” “cellular response to chemical stimulus,” and “regulation of cytokine  
27 production.” This finding of enriched innate immunity-related gene in our Xeno MG could be either  
28 reflect the nature of human microglia as reported previously<sup>12, 80</sup>, or the result from differential  
29 responses to critical signals from murine molecules, such as fractalkine. These results suggest that,  
30 compared to the host mouse microglia, Xeno MG and mouse microglia exhibit overall similar patterns of  
31 transcriptomic profile, but numerous species-specific differentially expressed genes were also  
32 observed.

33 Previous studies have shown that several disease risk genes, such as genes associated with  
34 AD, Parkinson’s disease (PD), multiple sclerosis (MS), and schizophrenia (SCZ), are preferentially  
35 expressed in microglia<sup>8, 80, 81</sup>. Moreover, relative expression of these genes in human and mouse  
36 microglia are also different<sup>8</sup>. Therefore, we examined the expression of disease risk genes in Xeno MG  
37 and mouse microglia from our chimeric mouse brain preparation. Expression of disease risk genes, as  
38 reported in a recent study<sup>8</sup>, had a highly similar differential expression pattern in co-resident mouse  
39 and human microglia (Figure 5D, E and supplementary Figure 8F-I). Specifically, with respect to MS,  
40 we found that out of 32 MS genes, 29 genes, including *ZFP36L1*, *RPL5*, and *NDFIP1* were more  
41 abundantly expressed in Xeno MG than in mouse microglia (Figure 5D and E). Similarly, out of 14 AD  
42 genes, 10 genes including *Apoc1*, *Sorl2*, and *Mpzl1*, were more abundantly expressed in Xeno MG  
43 than in mouse microglia (supplementary Figure 8F and I). Out of the 20 PD genes listed in a previous  
44 report<sup>8</sup>, 18 genes, such as *Vps13c*, *Snca*, *Fgf20*, *Mnrrn1*, and *Lrrk2*, had the same trend of differential  
45 expression with greater expression in Xeno MG than in mouse microglia (supplementary Figure 8H and  
46 I). We also found that some of the disease genes were preferentially expressed in mouse microglia,  
47 such as *Syt11* and *Gba* in PD. Altogether, these observations demonstrate that our hPSC microglial  
48 chimeric mouse brain can faithfully model disease-relevant transcriptomic differences between human  
49 and mouse microglia, and this new model will serve as a new tool for modeling human neurological  
50 disorders that involve dysfunction of microglia.

51

## 1 **Human PSC-derived microglia are dynamic in response to cuprizone-induced demyelination**

2 To explore whether Xeno MG are functionally dynamic in response to insult, we fed 3 months old  
3 chimeric mice with cuprizone-containing diet to induce demyelination. The cuprizone model is one of  
4 the most frequently used models to study the pathophysiology of myelin loss in multiple sclerosis<sup>82</sup>. It is  
5 appropriate to use our hiPSC microglial chimeric mouse brain to examine the dynamics of human  
6 microglia under a demyelination condition, considering our observation that a large number of Xeno MG  
7 reside in the corpus callosum at 3 to 4 months post-transplantation and Xeno MG were found nearly  
8 exclusively in the corpus callosum at 6 months post-transplantation (Figure 2C). After 4 weeks of  
9 cuprizone treatment, we found that myelin structure, indicated by MBP staining in the corpus callosum,  
10 was disrupted and became fragmented in our chimeric mice (Figures 6A), in contrast to the intact and  
11 continuous MBP<sup>+</sup> myelin structure in chimeric mice fed with control diet (supplementary Figure 9). As  
12 shown in the super-resolution images in Figure 6B and C, engulfment of MBP<sup>+</sup> myelin debris by both  
13 Xeno MG and mouse microglia were clearly seen in the corpus callosum. Notably, more myelin debris  
14 was found inside of mouse microglia, compared with Xeno MG (Figure 6D). In addition, we also  
15 examined the expression of CD74 and SPP1, which is known to be upregulated in multiple sclerosis<sup>83</sup>.  
16 Without cuprizone treatment, variations in CD74 expression among animals were observed in Xeno MG  
17 and on average, about 20% of Xeno MG expressed CD74 (Figure 6E and F). Nearly no Xeno MG  
18 expressed SPP1 in the corpus callosum (Figure 6G and H). With cuprizone treatment, many of the  
19 Xeno MG expressed CD74 or SPP1, recapitulating the upregulated expression of CD74 and SPP1 in  
20 MS (Figure 6E-H). In mice, CD74 and SPP1 were shown to characterize white matter-associated  
21 subsets of microglia that appear during development<sup>53</sup>. In our study, there was a discrepancy between  
22 the *CD74* and *SPP1* transcript levels and their protein levels. This might suggest an involvement of a  
23 sophisticated control of mRNA translation that was observed in regulation of other genes critical for  
24 brain development<sup>84, 85</sup>. Altogether, these results demonstrate that human Xeno MG are dynamic in  
25 response to insult in mouse brain.

26  
27

## 1 Discussion

2  
3 Humanized mouse models, in which the immune system is reconstituted with cells of human origin,  
4 have been well-established and provide powerful tools for studying cancer, inflammatory and infectious  
5 disease, and human hematopoiesis<sup>86</sup>. In this study, by engrafting neonatal mice with hPSC-derived  
6 PMPs, we demonstrate the generation of chimeric mouse brains in which hPSC-derived microglia  
7 widely disperse. We propose that the following three reasons may account for the generation of human  
8 microglial chimeric mouse brain. First, as compared to other types of neural cells, microglial cells are  
9 unique in that they turn over remarkably quickly, allowing the vast majority of the population to be  
10 renewed several times during a lifetime<sup>87-89</sup>. Previous studies have shown that neonatally transplanted  
11 human macroglial or neural progenitor cells can outcompete and largely replace the host mouse brain  
12 cells<sup>21, 90, 91</sup>. In this study, we also observe that the hPSC-derived PMPs are highly proliferative prior to  
13 transplantation and transplanted cells divide for at least 6 months in the mouse host brain. Therefore,  
14 the nature of high turnover rate of microglia and the competitive advantage of engrafted human cells  
15 over endogenous mouse cells may result in a large number of human donor-derived microglia and  
16 brain regions being repopulated by hPSC-derived microglia in the mouse brain at 6 months. Second,  
17 during early brain development, microglial cells use blood vessels and white matter tracts as guiding  
18 structures for migration and enter all brain regions<sup>34</sup>. Thus, transplantation of hPSC-derived PMPs to  
19 the anterior anlagen of the corpus callosum of the neonatal mouse brain in this study may facilitate  
20 migration of donor cell-derived microglia, resulting in wide dispersion of hPSC-derived microglia into  
21 different brain regions. In addition, in support of this concept, we also observe that in the mouse brain,  
22 hPSC-derived microglia are concentrated around and have close contact with blood vessels in both  
23 grey matter and white matter. Lastly, although several previous studies also transplanted hPSC-derived  
24 microglia into mouse brains, the generation of chimeric mice with a high degree of human microglial  
25 brain chimerism has not been reported<sup>16, 92</sup>. We propose that this might be because of the age of the  
26 host animals used for cell transplantation. Previous studies used adult animals for cell transplantation  
27<sup>16, 92</sup>. In our study, we transplanted hPSC-derived PMPs into the mouse brain at the earliest postnatal  
28 age, P0, as in general the neonatal brain is more receptive for the transplanted cells and more  
29 conducive for their survival and growth<sup>21, 24, 91</sup>. This is also supported by a recent study in which  
30 neonatal animals were used for cell transplantation<sup>42</sup>. Moreover, in contrast to those studies that  
31 mainly examined donor-derived microglia 2 months after transplantation, we characterized the donor-  
32 derived microglia up to 6 months post-transplant, which allowed the donor cells to develop for a longer  
33 term in the mouse brain. Although there were variations in chimerization among animals, this human  
34 microglia chimera model is highly reproducible according to scRNA-seq analysis using four chimeric  
35 mouse brains. We calculated the numbers of detected mouse/human microglia in each mouse brain  
36 sample and found that human microglia were consistently detected in each sample (legend to  
37 supplementary Figure 7). In addition, the high reproducibility of generating such a hiPSC microglial  
38 chimeric mouse brain model was also corroborated by two other recent reports<sup>31, 93</sup>.

39 Remarkably, we find that xenografted hiPSC-derived microglia developed in the mouse brain retain  
40 a human microglial identity. Importantly, xenografted hiPSC-derived microglia showed expression  
41 patterns of microglial maturity resembling adult human microglia derived from human brain tissue.  
42 Therefore, establishment of such a hiPSC microglial chimeric mouse model provides novel  
43 opportunities for understanding the biology of human microglia. First, this proof-of-concept study paves  
44 the path to interrogating the species differences between human vs. mouse microglia at molecular,  
45 functional, and behavioral levels using this hiPSC microglia chimeric mouse brain model. It has been  
46 increasingly recognized that as compared to mouse microglia, human microglia possess unique  
47 features under conditions of development, aging and disease<sup>8, 11-13</sup>. In our model, human and mouse  
48 microglia develop in the same brain, but we have observed that human microglia are morphologically  
49 distinct from their mouse counterparts and also exhibit signature gene expression profiles characteristic  
50 of human microglia isolated from brain. Microglia are intimately involved in processes of neuronal  
51 development, such as neurogenesis, synaptogenesis, and synaptic pruning<sup>94-96</sup>. Building upon the

1 differential expression profiles, our model will be useful to investigate how human and mouse microglia  
2 function differently in shaping neuronal development. Similar to a recent report <sup>31</sup>, our engrafted PMPs  
3 give to a small population of CNS macrophages. There are also potentially mouse-derived CNS  
4 macrophages in the brain tissue that we collected for single-cell RNA-seq, but likely to represent a  
5 small fraction of the total cluster. Therefore, within microglial clusters from each species, results may  
6 include some similar but distinguishable cell types. However, the primary gene expression differences  
7 are likely to be driven by the majority microglia. This was also supported by the observation that  
8 previously-reported signature genes expressed in human vs. mouse microglia <sup>8</sup> were differentially  
9 expressed in our results. Nevertheless, we take a conservative interpretation and did not claim to  
10 identify any novel gene expression differences between human vs. mouse microglia based on the  
11 current RNA-seq data. Second, a previous study reports that engrafted human astrocytes modulate  
12 other CNS cell types in the mouse brain, particularly enhancing neuronal synaptic plasticity <sup>24</sup>. Thus, in  
13 future studies, our hiPSC microglial chimeric mouse model will provide fascinating opportunities to  
14 understand how the inclusion of human microglia in the developing brain ultimately impacts neuronal  
15 development, synaptic plasticity, as well as the behavioral performance of the animals. Third, several  
16 transcriptomic studies <sup>12, 20</sup> have clearly demonstrated that microglial genes are differently regulated  
17 during aging and neurodegeneration between mice and humans, indicating the importance of  
18 developing a human microglia model to study human microglial function across different development  
19 stages, particularly adult microglia for studying aging-related and neurodegenerative disorders. our  
20 single-cell RNA-seq data suggests that Xeno MG resemble to adult human microglia. Moreover,  
21 functional analyses demonstrate that Xeno MG are dynamic in response to cuprizone-induced  
22 demyelination and recapitulate the upregulated expression of CD74 and SPP1 seen in MS patients<sup>83</sup>,  
23 providing proof of concept that our chimeric mouse model has the ability to exhibit functional changes  
24 of human microglia under disease conditions. Combined with human iPSC technologies, such as the  
25 availability of edited, isogenic cells with or without disease-related genes, the hiPSC microglia chimeric  
26 mouse model will be informative in teasing out the roles of human microglia in neurodevelopmental  
27 disorders, neurodegenerative disorders, as well as brain infections by viruses such as Zika virus and  
28 HIV-1.

29 Similar to reports of hiPSC macroglial or neuronal chimeric mouse brain models <sup>21, 24, 91</sup>, in the  
30 current hPSC microglial chimeric mouse model, the endogenous mouse counterpart cells are still  
31 present. In contrast to macroglial cells and neurons, microglial cells can be acutely depleted (up to 99%  
32 depletion) in the entire brain without significantly affecting the viability of animals, by pharmacologically  
33 inhibiting signaling pathways that are important for the survival and development of microglia, such as  
34 colony-stimulating factor 1 (CSF1) signaling <sup>97</sup> or by genetically coupling suicide genes under the  
35 control of promoters of microglia-specific genes <sup>1, 98</sup>. In future studies, it will be interesting to explore the  
36 possibility of creating humanized mouse brains containing solely hiPSC-derived microglia, by depleting  
37 endogenous mouse microglia using pharmacological or genetic approaches in neonatal mouse brains  
38 prior to engraftment of hiPSC-derived microglia. In addition, co-transplantation of human PSC-derived  
39 PMPs and neural or macroglial progenitors may generate chimeric mouse brain containing human  
40 microglia, neurons, and macroglial cells. Currently, in this proof-of-concept hPSC microglial chimeric  
41 mouse brain model, there is a lack of peripheral adaptive immune system in the host due to a *Rag2*<sup>-/-</sup>  
42 mutation. To circumvent this limitation, hiPSC-derived PMPs can be transplanted into animals in which  
43 the immune system is humanized by the same hiPSC-derived hematopoietic stem cells <sup>36, 99, 100</sup>. This  
44 will further allow the generation of animals with isogenic adaptive immune system and brain innate  
45 immune system derived from the same human individuals. Combined with recently developed hiPSC  
46 cerebral organoid models that contain microglia <sup>16, 78</sup>, chimeric mouse brain models may help further  
47 our understanding of the complex interactions between human microglia and human neurons and  
48 macroglial cells under normal and disease conditions.

## 1 METHOD DETAILS

### 3 **Generation, culture, and quality control of hPSC lines.**

4 One healthy control female hiPSC line and female H9 ESC line were used this study. The hiPSC line  
5 were generated from healthy adult-derived fibroblasts using the “Yamanaka” reprogramming factors, as  
6 reported in our previous study<sup>101</sup>. The hiPSC line has been fully characterized by performing  
7 karyotyping, teratoma assay, DNA fingerprinting STR (short tandem repeat) analysis, gene expression  
8 profiling, and Pluritest (www.PluriTest.org), a robust open-access bioinformatic assay of pluripotency in  
9 human cells based on their gene expression profiles<sup>102</sup>, as described in our previous study<sup>101</sup>. The  
10 hPSCs were maintained under feeder-free condition and cultured on dishes coated with hESC-qualified  
11 Matrigel (Corning) in mTeSR1 media (STEMCELL Technologies). Human PSCs from passage number  
12 15 to 30 were used. The hPSCs were passaged approximately once per week with ReLeSR media  
13 (STEMCELL Technologies). All hPSC studies were approved by the Embryonic Stem Cell Research  
14 Oversight (ESCRO) committee at Rutgers University.

### 16 **PMP generation and culture**

17 PMP were generated from hiPSCs and H9 hESCs, using a published protocol<sup>18</sup>. Briefly, the yolk sac  
18 embryoid bodies (YS-EBs) were generated by treating the EBs with bone morphogenetic protein 4  
19 (BMP4, 50 ng/ml, Peprotech; to induce mesoderm), vascular endothelial growth factor (VEGF, 50  
20 ng/ml, Peprotech; endothelial precursors), and stem cell factor (SCF, 20 ng/ml, Miltenyi Biotech;  
21 hematopoietic precursors). Next, the YS-EBs were plated into dishes with interleukin-3 (IL-3, 25 ng/ml,  
22 Peprotech) and macrophage colony-stimulating factor (M-CSF, 100 ng/ml, Invitrogen) to promote  
23 myeloid differentiation. At 2–3 weeks after plating, human hPMPs emerged into the supernatant and  
24 were continuously produced for more than 3 months. The cumulative yield of PMPs was around 40-fold  
25 higher than the number of input hPSCs (Figure 1A), similar to the previous studies<sup>16,18</sup>. PMPs were  
26 produced in a Myb-independent manner and closely recapitulating primitive hematopoiesis<sup>118,27</sup>.

### 28 **Animals and Cell transplantation**

29 PMP were collected from supernatant and suspended as single cells at a final concentration of 100,000  
30 cells per  $\mu$ l in PBS. The cells were then injected into the brains of P0 Rag2<sup>-/-</sup>hCSF1 immunodeficient  
31 mice (C;129S4-Rag2<sup>tm1.1Flv</sup> Csf1<sup>tm1(CSF1)Flv</sup> Il2rg<sup>tm1.1Flv</sup>/J, The Jackson Laboratory). The precise  
32 transplantation sites were bilateral from the midline =  $\pm$  1.0 mm, posterior bregma = -2.0 mm, and  
33 dorsoventral depth = -1.5 and -1.2 mm (Figure 1C). The mouse pups were anesthetized by placing  
34 them on ice for 5 minutes. Once cryo-anesthetized, the pups were placed on a digital stereotaxic device  
35 (David KOPF Instruments), equipped with a neonatal mouse adaptor (Stoelting). The pups were then  
36 injected with 0.5  $\mu$ l of cells into each site (total 4 sites) by directly inserting Hamilton needles through  
37 the skull into the target sites. The pups were weaned at 3 weeks and were kept up to 6 months before  
38 they were tested for the engraftment of human cells. All animal work was performed without gender  
39 bias with approval of the Institutional Animal Care and Use Committee (IACUC).

40 Both hiPSC- and hESC-derived PMPs were transplanted into mouse brains. Both engrafted  
41 hiPSC- and hESC-derived microglia were analyzed, including characterization of their marker  
42 expression (Figure 1), morphological changes along brain development (Figure 2), and their phagocytic  
43 functions under homeostatic condition (Figures 3), as well as toxin-induced demyelination condition  
44 (Figure 6). For the quantification, we pooled the data collected from both hiPSC- and hESC-derived  
45 microglia. In the single-cell RNA-sequencing experiment, we only used the animals received  
46 transplantation of hiPSC-derived microglia. For cuprizone-induced demyelination, three months old  
47 chimeric mice were fed with cuprizone diet (Sigma-Aldrich, 0.2%) or control diet for four weeks as  
48 previously report<sup>103</sup>.

### 50 **Sample preparation and library construction for Single-cell RNA sequencing**

1 Six months old chimeric mice that received transplantation of microglia derived from the hiPSC line  
2 were used for single-cell RNA-sequencing experiments. The mice were perfused with oxygenated  
3 solution (2.5 mM KCl, 87 mM NaCl, 1.25 mM NaH<sub>2</sub>PO<sub>4</sub>, 26 mM NaHCO<sub>3</sub>, 75 mM sucrose, 20 mM  
4 glucose, 2 mM MgSO<sub>4</sub>, and 1 mM CaCl<sub>2</sub>) as reported<sup>104</sup> and the brain was quickly extracted and kept in  
5 the same cold solution for vibratome (VT1200, Leica) sectioning (500µm thickness) and dissection. The  
6 brain regions were isolated from where engrafted hiPSCs-derived microglia largely dispersed, including  
7 the cerebral cortex, hippocampus, corpus callosum, and olfactory bulb. The selected regions were  
8 chopped with Spring Scissors (WPI) into fine pieces for further dissociation into single cells, based on  
9 10x Genomic Sample Preparation Domstratd Protocol (Dissociation of Mouse Embryonic Neural  
10 Tissue) with modifications. Briefly, the pieces were collected and dissociated with the Papain (1mg/ml,  
11 Sigma) and DNAase I (100 unit/ml, Roche) in Hibernate solution (Gibco) in 37°C for 20 minutes.  
12 Tissues were washed and triturated with wide-bore tips in cold Hibernate solution until no visible  
13 chunks. The samples were spun down in 200 rcf for 2 minutes in 4°C and filtered through 30 µm cell  
14 strainer to obtain single cells for cell counting and library preparation. To generate libraries, 20,000 cells  
15 were loaded for each sample. Chromium™ Single Cell 3' Library and Gel Bead Kit v2, 4 rxns,  
16 Chromium™ i7 Multiplex Kit, 96 rxns, and Chromium™ Single Cell A Chip Kit, 16 rxns are used from  
17 10x Genomic single cell gene expression kit. cDNA libraries were generated following the manufacturer  
18 instructions.

## 19 20 **Bulk and single-cell RNA sequencing**

21 We performed bulk RNA-sequencing analysis of hiPSC-derived PMPs as previously reported<sup>22</sup>. Briefly,  
22 total RNA was prepared with RNAeasy kit (QIAGEN) and libraries were constructed using 600 ng of  
23 total RNA from each sample and the TruSeqV2 kit from Illumina (Illumina, San Diego, CA) following  
24 manufacturers suggested protocol. The libraries were subjected to 75 bp paired read sequencing using  
25 a NextSeq500 Illumina sequencer to generate approximately 30 to 36 million paired-reads per sample.  
26 Fastq files were generated using the Bc12Fastq software, version 1.8.4. The genome sequence was  
27 then indexed using the rsem-prepare-reference command. Each fastq file was trimmed using the fqtrim  
28 program, and then aligned to the human genome using the rsem-calculate-expression (version 1.2.31)  
29 command to calculate FPKM (fragments per kilobase of transcript per million mapped reads) values. In  
30 order to analyze the transcripts, FPKM > 1 was set as cutoff to filter transcripts.

31 For single-cell RNA sequencing, we have used Chromium™ i7 Multiplex Kit, 96 rxns,  
32 Chromium™ Single Cell 3' Library and Gel Bead Kit v2 and Chromium™ Single Cell A Chip Kit for  
33 capture and library preparation. Single cell RNA sequencing was performed by RUCDR® Infinite  
34 Biologics at Rutgers by using a 10X Genomics single cell gene expression profiling kit. The libraries  
35 were analyzed on Agilent 4200 TapeStation System using High Sensitivity D1000 ScreenTape Assay  
36 (Cat #: 5067-5584) and quantified using KAPA qPCR (Cat # KK4835). Libraries and then normalized to  
37 10nM before being pooled together. The pooled library was then clustered and sequenced on Illumina  
38 HiSeq 2500 in Rapid Run Mode, using the following parameters: 36bp forward read, 100bp reverse  
39 read, and 8bp index read. For each individual library, the sequencing data from 4 unique indexes were  
40 combined before further analysis.

41 Sequencing reads were aligned with pooled mouse (mm10) and human (hg19) reference  
42 genomes and the barcodes were interpreted using Cellranger software (10X Genomics, v. 3.0.0). The  
43 resulting matrices of gene counts x barcodes were coded by individual sample identifier and loaded into  
44 Seurat (v. 3.0.0) software<sup>105-107</sup> in R/Bioconductor<sup>108</sup>. An initial analysis revealed a distinct cluster of  
45 human-expressing cells. To compare expression across species, a strategy was employed similar to  
46 one used previously<sup>109</sup>. A table of 17,629 unique matching genes was prepared, starting with a  
47 human-mouse gene homology list obtained from Jackson Labs  
48 (<http://www.informatics.jax.org/downloads/reports/index.html#marker>), and hand-curating to remove  
49 duplicates. The homologous genes list is deposited in a public data archive at  
50 <https://github.com/rhart604/mousify/blob/master/geneTrans.txt>. Sample/barcode identifiers for the  
51 human-specific data were isolated and matching gene symbols were converted from human to mouse.

1 Sample/barcode identifiers not matching this cluster were assumed to be mouse, and these were  
2 trimmed to retain only mouse gene symbols matching the homology list. Complete details of homology  
3 gene translation are described elsewhere <sup>110</sup>.

4 To model both human and mouse results in a comparable system, we assigned individual  
5 sequencing reads to the optimal species using the alignment score in the bam file, and then separated  
6 the original fastq files into individual sets specific by species. These were re-processed with separated  
7 mouse or human reference genome indices and then recombined after translating homologous genes.  
8 In the end, only 147 out of 19,154 barcodes, or 0.76%, included sequences optimally aligning with both  
9 species, likely caused by the creation of droplets containing cells from more than one species, so these  
10 were eliminated from further consideration. The entire procedure, along with comparisons to alternative  
11 strategies, including all required R and Python code, is described elsewhere <sup>110</sup>.

12 For analysis of human microglial sub-clusters, extracted human sample/barcode were restricted  
13 to human gene symbol results and re-analyzed with Seurat. Gene ontology analysis used the g:Profiler  
14 <sup>111</sup> website (<https://biit.cs.ut.ee/gprofiler/gost>).

15 For comparisons among sources of human microglia, raw RNAseq reads from the human-  
16 specific cluster were pooled by sample and aligned with reference human genome (hg38) using  
17 HISAT2 <sup>112</sup>. Raw sequencing reads from other publications were downloaded from GEO (series  
18 accessions GSE99074<sup>12</sup>, GSE97744<sup>17</sup>, GSE102335<sup>78</sup>, and GSE133434<sup>42</sup>). After similar HISAT2  
19 alignment, all count summaries were imported into a DESeq2 <sup>113</sup> data model and a variance  
20 stabilization transformation was applied prior to principal components analysis.

## 21 22 **Immunostaining and cell counting**

23 Mouse brains fixed with 4% paraformaldehyde were put in 20% and 30% sucrose for dehydration. After  
24 dehydration, brain tissues were blocked with OCT and frozen by solution of dry ice and pure alcohol.  
25 The frozen tissues were cryo-sectioned with 30  $\mu$ m thickness for immunofluorescence staining <sup>114, 115</sup>.  
26 The tissues were blocked with blocking solution (5% goat or donkey serum in PBS with Triton X-100) in  
27 room temperature (RT) for 1 hr. The Triton X-100 concentration was 0.8% for brain tissue. The primary  
28 antibodies were diluted in the same blocking solution and incubated with tissues in 4 °C overnight. The  
29 primary antibodies were listed in supplementary Table S3. Then, the sections were washed with PBS  
30 and incubated with secondary antibodies for 1 hr in RT. After washing with PBS, the slides were  
31 mounted with the anti-fade Fluoromount-G medium containing 1, 40,6-diamidino-2-phenylindole  
32 dihydrochloride (DAPI) (Southern Biotechnology). For PSD95 peptide blocking experiment, PSD95  
33 antibody (2.5  $\mu$ g/ml) was incubated with five times PSD95 blocking peptide (12.5  $\mu$ g/ml, Synaptic  
34 System) or equivalent amount of PBS at RT for 30 minutes before applying secondary antibodies to the  
35 brain tissues as suggested by the manufacturer instructions.

36 Images were captured with a Zeiss 710 confocal microscope. Large scale images in Figure 1D,  
37 supplementary Figure 1A and 1B were obtained by confocal tile scan and automatically stitched using  
38 10% overlap between tiles by Zen software (Zeiss). For 3D reconstructive images in Figure 3E, Figure  
39 6A and Supplementary Figure 6B, 6D and 6E were processed by Zen software (Zeiss). To visualize  
40 synaptic puncta pruning, myelin debris engulfment, super-resolution images in Figure 3A, 3B, 3D,  
41 Figure 6B, 4C, Supplementary Figure 5 and Supplementary Figure 6A, 6C were acquired by Zeiss  
42 Airyscan super-resolution microscope at 63X with 0.2  $\mu$ m z-steps. Cell number and microglia process  
43 length and endpoints were counted with ImageJ software, following our previous report <sup>22</sup> and the  
44 published protocol <sup>116</sup>. At least five consecutive sections of each brain region were chosen. The number  
45 of positive cells from each section was counted after a Z projection and at least 7 mice in each group  
46 were counted. The number of synaptic puncta or myelin debris were calculated from 7 mice in each  
47 group, minimal 10 cells per animal. Engraftment efficiency and degree of chimerization were assessed  
48 by quantifying the percentage of hTMEM119<sup>+</sup> cells among total DAPI<sup>+</sup> cells in sagittal brain sections, as  
49 reported in the previous studies <sup>24, 25</sup>. The cell counting was performed on every fifteenth sagittal brain  
50 section with a distance of 300  $\mu$ m, covering brain regions from 0.3 to 2.4 mm lateral to the midline  
51 (seven to eight sections from each mouse brain were used).

1  
2  
3  
4  
5  
6  
7  
8  
9

**Data analysis**

All data represent mean  $\pm$  s.e.m. For the data presented as bar-and-data overlap plots. When only two independent groups were compared, significance was determined by two-tailed unpaired t-test with Welch's correction. When three or more groups were compared, one-way ANOVA with Bonferroni post hoc test or two-way ANOVA was used. A P value less than 0.05 was considered significant. The analyses were done in GraphPad Prism v.5.

**Data availability**



1 The accession number of the single-cell RNA sequencing data reported in this study is GEO:

2 **GSE129178.****Acknowledgements**

3 This work was in part supported by grants from the NIH (R21HD091512 and R01NS102382 to P.J.)

4 R.P.H. was supported by R01ES026057, R01AA023797, and U10AA008401. X.L. was supported by

5 the Jiangsu Government Scholarship for Overseas Studies from China. We thank Dr. Cheryl Dreyfus

6 from Rutgers Robert Wood Johnson Medical School for the suggestions on cuprizone model, Dr.

7 Noriko Kane-Goldsmith from Rutgers University for assistance with Zeiss Airyscan super-

8 resolution imaging, and Dr. Brian Daniels from Rutgers University for critical reading of the manuscript.

9 We also thank Ms. Maharaib Syed from Rutgers University for the assistance with

10 immunohistochemistry.

11

### 12 **Author Contributions**

13 P.J. and R.X. designed experiments and interpreted data; R.X. carried out most of experiments with

14 technical assistance from A.B., X.L., A.P., and K.K.; R.P.H. performed the gene expression analysis,

15 interpreted the data, and provided critical suggestions to the overall research direction; P.J. directed the

16 project and wrote the manuscript together with R.X. and input from all co-authors.

17

### 18 **Competing Financial Interests**

19 The authors declare no competing financial interests.

20

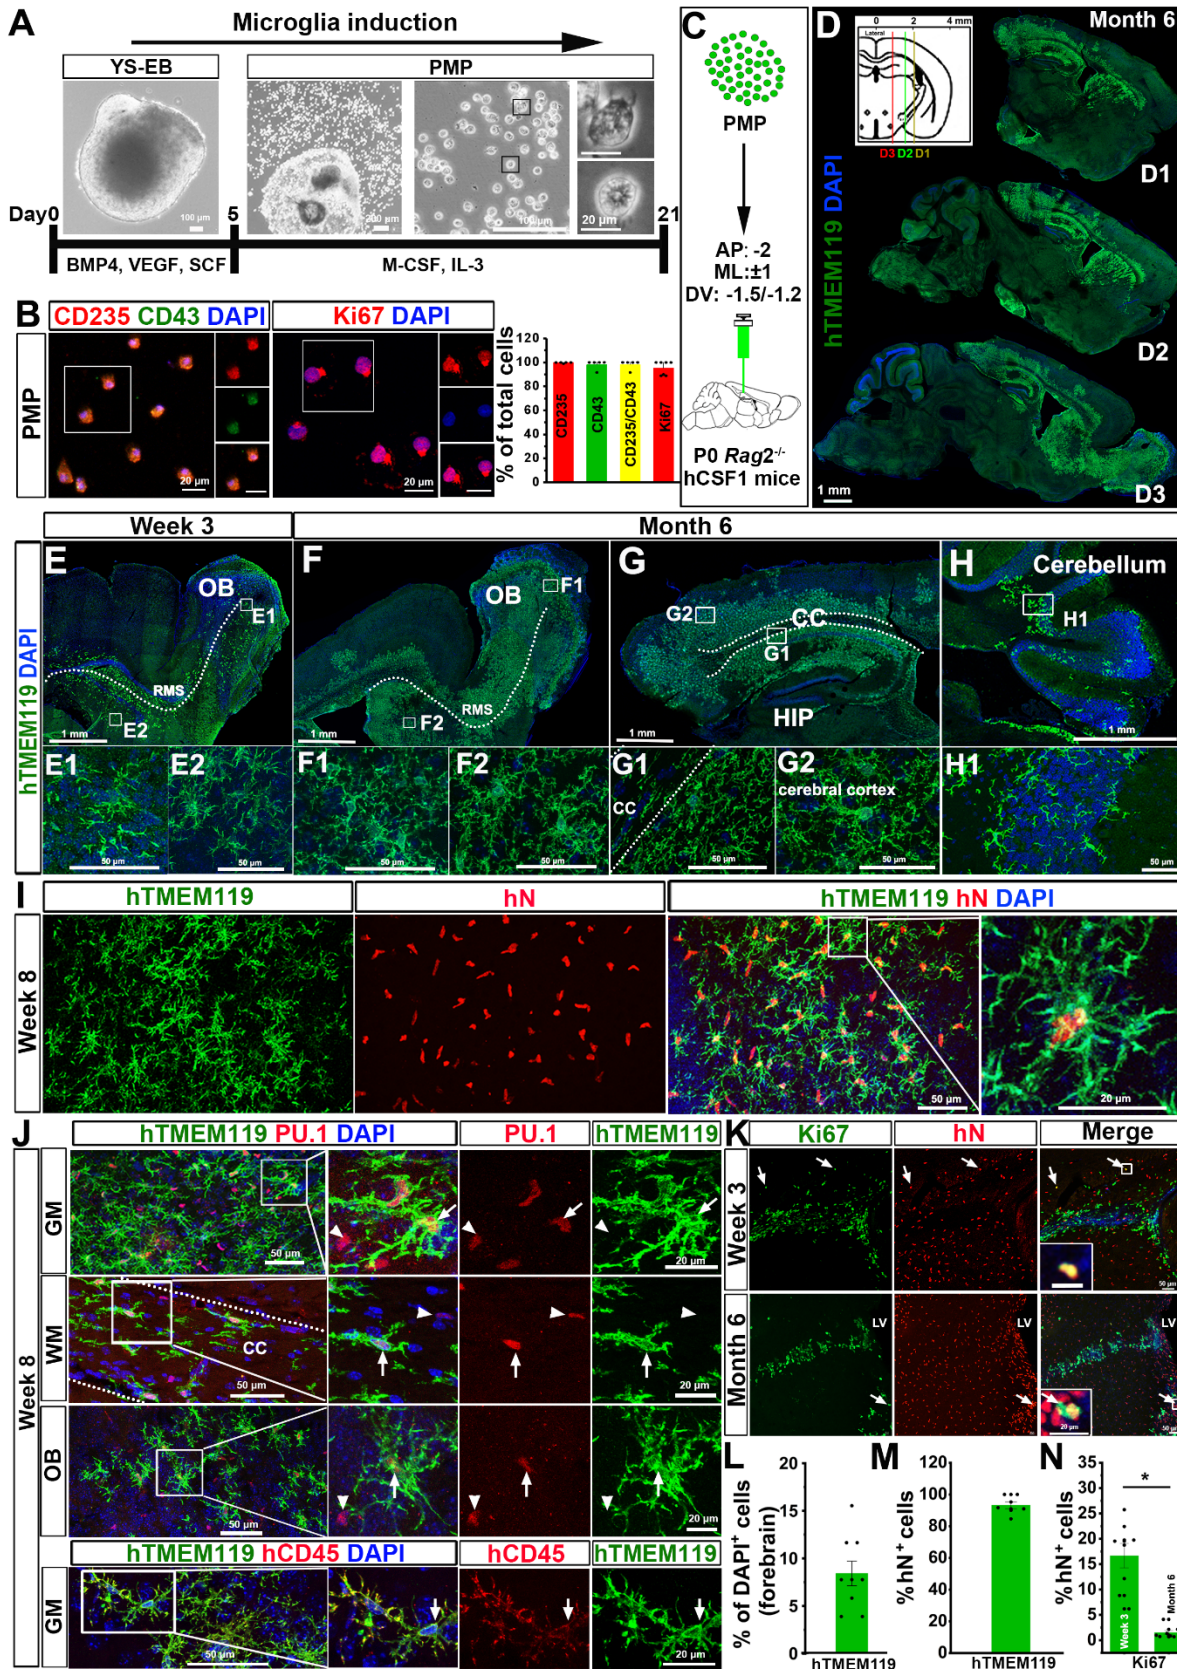

1 **Figure 1. Generation of hPSC microglial chimeric mouse brains.**  
2 (A) A schematic procedure for generating primitive macrophage precursor (PMP) from hiPSCs or  
3 hESCs-derived yolk sac embryoid bodies (YS-EB). Insets: representative bright-field images at different  
4 stages. Scale bars represent 100  $\mu\text{m}$ , 200  $\mu\text{m}$ , and 20  $\mu\text{m}$  as indicated in the images  
5 (B) Representative images and quantification of CD235<sup>+</sup>, CD43<sup>+</sup>, CD235<sup>+</sup>/CD43<sup>+</sup>, and Ki67<sup>+</sup> cells in  
6 PMP. Quantification of pooled data from one hiPSC line and one hESC line. The experiments are  
7 repeated for at least 5 times ( $n = 5-7$ ) and for each experiment, the two stem cell lines are used. Data  
8 are presented as mean  $\pm$  s.e.m. Scale bars: 20  $\mu\text{m}$  in the original and enlarged images.  
9 (C) A schematic diagram showing that hPSC-derived PMP are engrafted into the brains of P0 *rag2*<sup>-/-</sup>  
10 hCSF1 mice.  
11 (D) Representative images from sagittal brain sections showing the wide distribution of xenografted  
12 hPSC-derived microglia at six months post-transplantation. Anti-human-specific TMEM119  
13 (hTMEM119) selectively labels xenografted hPSC-derived microglia. Scale bar: 1 mm.  
14 (E-H) Representative images from sagittal brain sections showing the distribution of hTMEM119<sup>+</sup>  
15 xenografted hPSC-derived microglia at 3 weeks and 6 months post-transplantation in different brain  
16 regions. OB, olfactory bulb; RMS, rostral migratory stream; CC, corpus callosum; HIP, Hippocampus.  
17 Scale bars: 1 mm or 50  $\mu\text{m}$  in the original or enlarged images, respectively.  
18 (I) Representative images of hTMEM119<sup>+</sup> cells among the total donor-derived hN<sup>+</sup> cells in grey matter  
19 at 8 weeks post-transplantation. Scale bars, 50  $\mu\text{m}$  or 20  $\mu\text{m}$  in the original or enlarged images,  
20 respectively.  
21 (J) Representative images of PU.1- and human-specific CD45 (hCD45)-expressing cells in the donor-  
22 derived hTMEM119<sup>+</sup> cells in different brain regions at 8 weeks post-transplantation. Scale bars, 50  $\mu\text{m}$   
23 or 20  $\mu\text{m}$  in the original or enlarged images, respectively.  
24 (K) Representative images of Ki67<sup>+</sup> cells among the total donor-derived hN<sup>+</sup> cells at 3 weeks and 6  
25 months post-transplantation. Scale bars, 50  $\mu\text{m}$  or 20  $\mu\text{m}$  in the original or enlarged images,  
26 respectively.  
27 (L) Quantification of the percentage of hTMEM119<sup>+</sup> cells in total DAPI<sup>+</sup> cells in the forebrain at 6  
28 months post-transplantation ( $n = 9$  mice). The data are pooled from the mice received transplantation of  
29 microglia derived from both hESCs and hiPSCs. Data are presented as mean  $\pm$  s.e.m.  
30 (M) Quantification of the percentage of hTMEM119<sup>+</sup> cells in total hN<sup>+</sup> cells ( $n = 7$  mice). Data are  
31 presented as mean  $\pm$  s.e.m.  
32 (N) Quantification of Ki67<sup>+</sup> cells among the total donor-derived hN<sup>+</sup> cells at 3 weeks or 6 months post-  
33 transplantation ( $n = 8$  mice for each time point). The data are pooled from the mice that received  
34 transplantation of microglia derived from both hESCs and hiPSCs. Student's *t* test. \*\* $P < 0.01$ . Data are  
35 presented as mean  $\pm$  s.e.m.

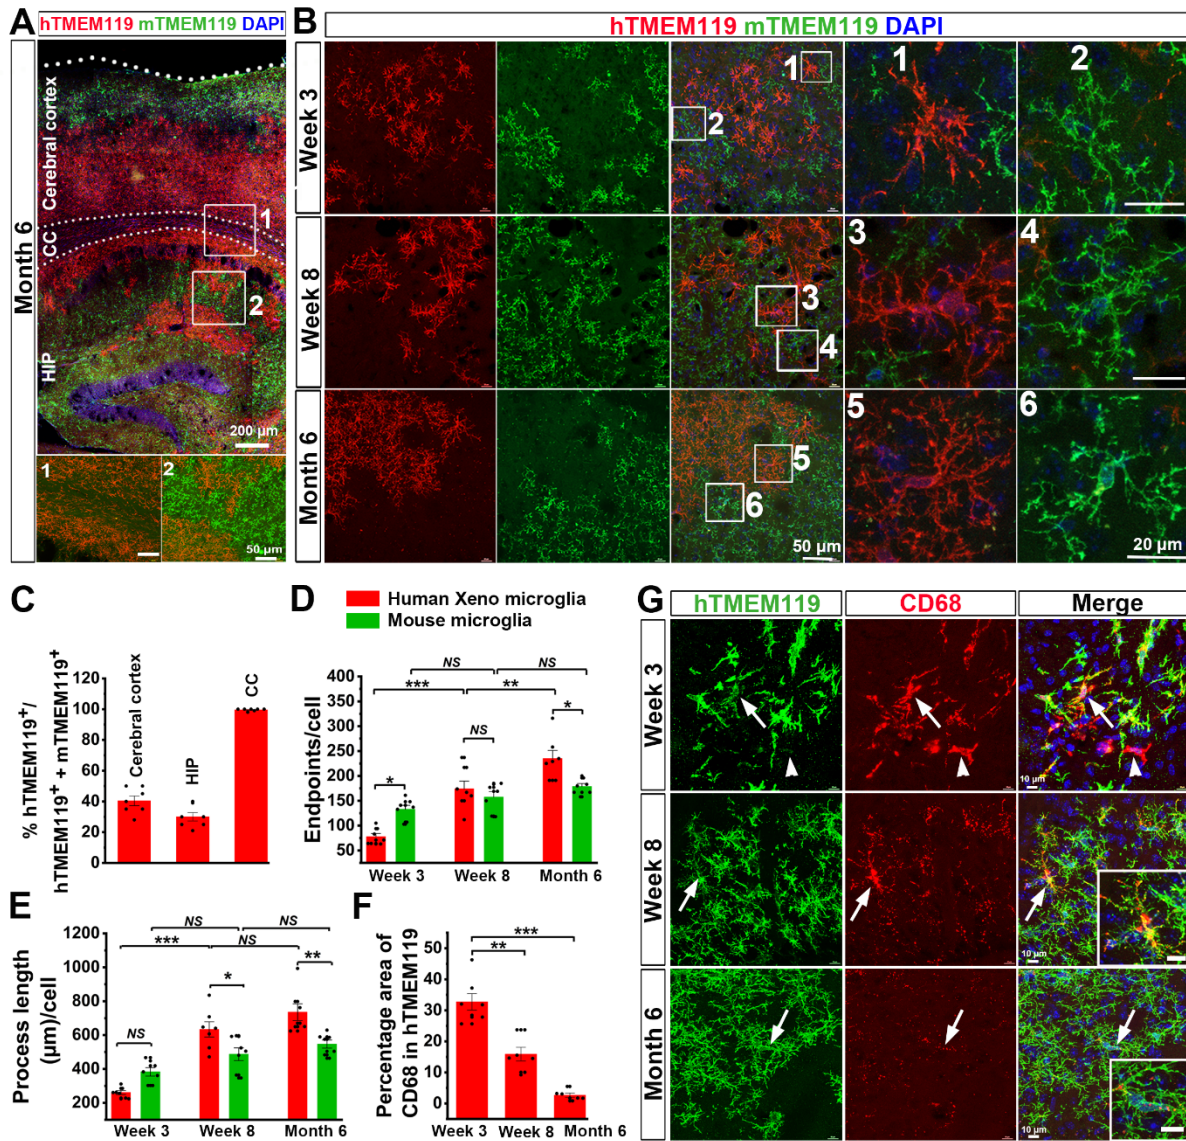

1 **Figure 2. Human PSC-derived microglia undergo morphological maturation.**  
2 (A) Representative images of hTMEM119<sup>+</sup> hPSC-derived microglia and mTMEM119<sup>+</sup> mouse microglia  
3 in the cerebral cortex, corpus callosum (CC) and hippocampus (HIP) in 6 months old mice. Scale bars  
4 represent 200  $\mu$ m and 50  $\mu$ m in the original and enlarged images, respectively.  
5 (B) Representative images of hTMEM119<sup>+</sup> hPSC-derived microglia and mTMEM119<sup>+</sup> mouse microglia  
6 in the cerebral cortex in 3 weeks, 8 weeks, and 6 months old mice. Scale bars represent 50  $\mu$ m and 20  
7  $\mu$ m in the original and enlarged images, respectively.  
8 (C) Quantification of the percentage of hTMEM119<sup>+</sup> cells in total microglia (hTMEM119<sup>+</sup> plus  
9 mTMEM119<sup>+</sup>) in the cerebral cortex, hippocampus (HIP), corpus callosum (CC) in 6 months old  
10 chimeric mice (n = 7 mice for each time point). The data are pooled from the mice received  
11 transplantation of microglia derived from both hESCs and hiPSCs. Data are presented as mean  $\pm$   
12 s.e.m.  
13 (D and E) Quantification of endpoint numbers and total process length of mouse and hPSC-derived  
14 microglia based on mTMEM119 or hTMEM119 staining respectively from grey matter at the three time  
15 points (n = 7 mice for each time point). The data are pooled from the mice received transplantation of  
16 microglia derived from both hESCs and hiPSCs. Two-way ANOVA is used to compare the endpoints  
17 and process length between human and mouse microglia and one-way ANOVA is used for the  
18 comparison within mouse or human microglia. \*P < 0.05, \*\*\*P < 0.001, NS, no significance. Data are  
19 presented as mean  $\pm$  s.e.m.  
20 (F) Quantification of the percentage of CD68<sup>+</sup> area in hTMEM119<sup>+</sup> area from cerebral cortex in 3  
21 weeks, 8 weeks and 6 months old chimeric mice (n = 7 mice for each time point). The data are pooled  
22 from the mice received transplantation of microglia derived from both hESCs and hiPSCs. One-way  
23 ANOVA test, \*\*P < 0.01, \*\*\*P < 0.001. Data are presented as mean  $\pm$  s.e.m.  
24 (G) Representative images of CD68- and hTMEM119-expressing cells in the cerebral cortex from 3  
25 weeks, 8 weeks and 6 months old mice. Scale bars, 10  $\mu$ m or 2  $\mu$ m in the original or enlarged images,  
26 respectively.  
27

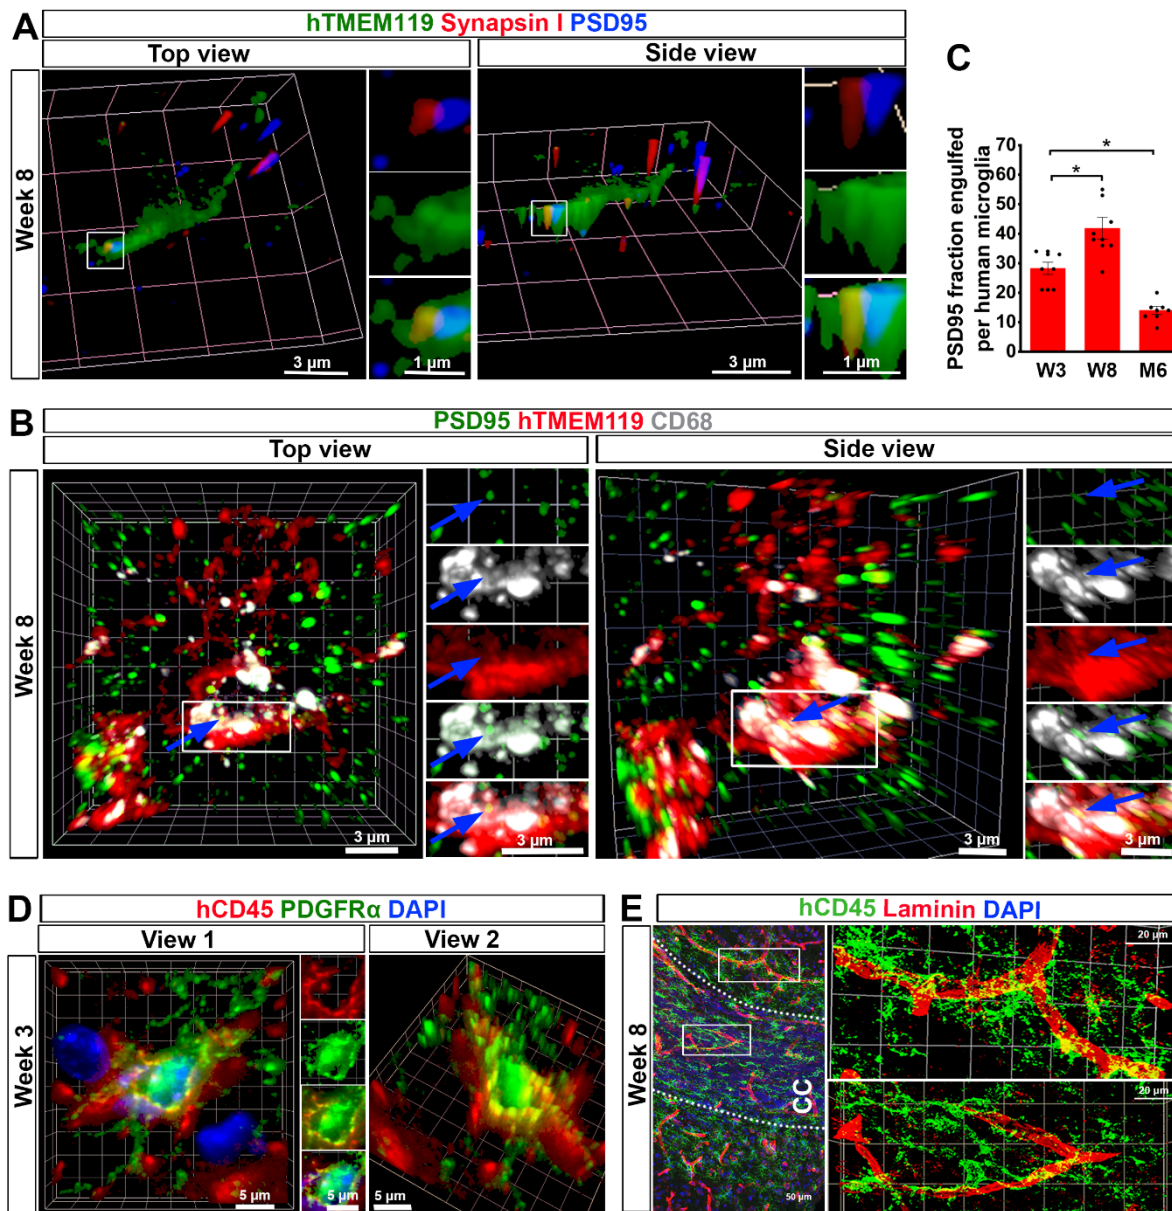

1 **Figure 3. Human PSC-derived microglia are functional in the mouse brain.**  
2 (A) Representative 3D reconstruction of super-resolution images showing hTMEM119<sup>+</sup> donor-derived  
3 microglia engulf synaptic proteins, synapsin I and PSD95 in grey matter at 8 weeks post-  
4 transplantation. Scale bars, 3 and 1 $\mu$ m in the original or enlarged images, respectively.  
5 (B) Representative 3D reconstruction of super-resolution images showing colocalization of hTMEM119,  
6 PSD95, and CD68 staining in grey matter at 8 weeks post-transplantation. Scale bars, 3 in the original  
7 and enlarged images.  
8 (C) Quantification of PSD95<sup>+</sup> fraction engulfed per microglia from cerebral cortex at the three time  
9 points (n = 7 mice for each time point). The data are pooled from the mice received transplantation of  
10 microglia derived from both hESCs and hiPSCs One-way ANOVA test, \*P < 0.05. Data are presented  
11 as mean  $\pm$  s.e.m.  
12 (D) Representative 3D reconstruction of super-resolution images showing that hCD45<sup>+</sup> hPSC-derived  
13 microglia phagocytize PDGFR $\alpha$ <sup>+</sup> oligodendroglial cells in the corpus callosum at 3 weeks post-  
14 transplantation. Scale bars, 5  $\mu$ m.  
15 (E) Representative images showing the interaction between laminin<sup>+</sup> blood vessels and hCD45<sup>+</sup> human  
16 microglia in grey matter and white matter at 8 weeks post-transplantation. Scale bars, 50 and 20  $\mu$ m in  
17 the original or enlarged images, respectively.  
18

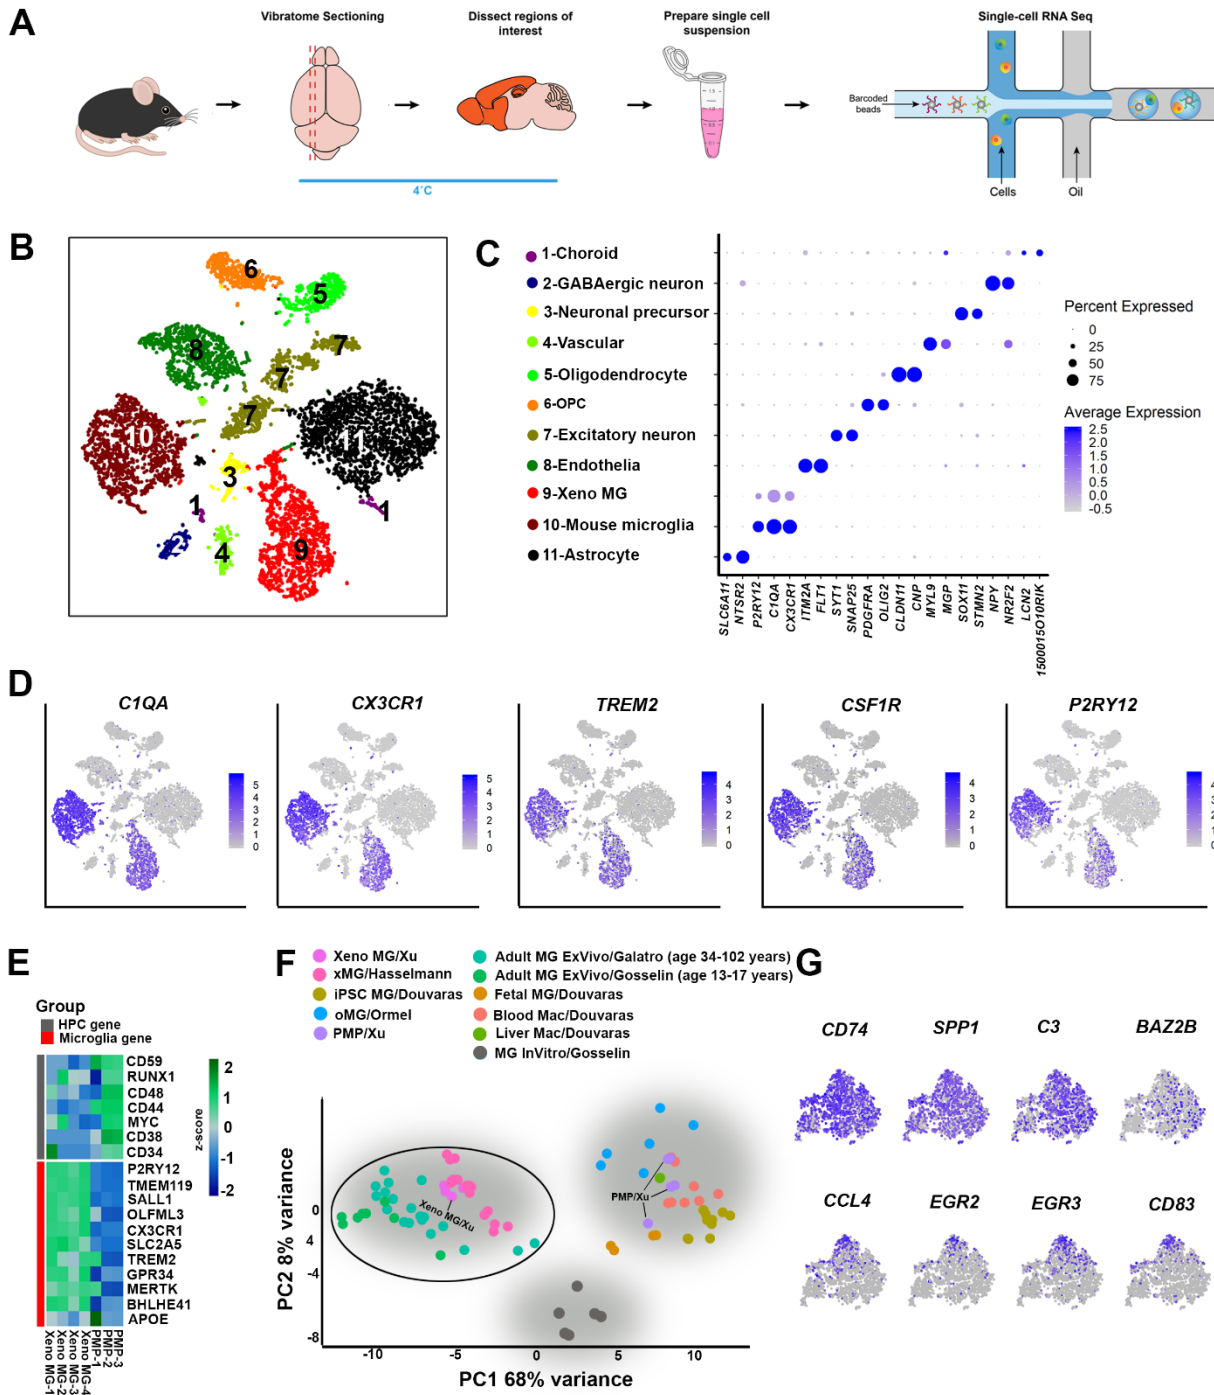



1 **Figure 4. Single-cell RNA-seq analysis of hiPSC microglial chimeric mouse brain.**  
2 (A) A schematic diagram showing the experimental design. Microglia were isolated from the highlighted  
3 brain regions at 6 months post-transplantation and handled at 4°C to reduce ex vivo activation. The  
4 single-cell suspension was loaded into a 10X Genomics Chromium system for single-cell RNA-  
5 sequencing.  
6 (B) tSNE plot of 11 cell types as identified by characteristic cell-specific gene expression, following  
7 translation of human gene symbols to mouse symbols as described in Methods. Arrow indicates the  
8 human xenograft microglia (Xeno MG).  
9 (C) Dot plot showing two representative cell-specific genes for each cell cluster. As indicated by the  
10 legend, the diameter of the dot indicates the percent of cells within a cluster expressing the gene  
11 (percent expression). The color saturation indicates the average expression over the cluster (average  
12 expression; log normalized counts). The cluster numbers, colors of clusters in panel B, and selected  
13 cell identities are shown at left.  
14 (D) tSNE plots with dots (representing individual barcodes/cells) colored by expression of canonical  
15 microglial genes, based on expression level determined in Seurat (log normalized counts).  
16 (E) A heatmap showing expression of signature genes of hematopoietic progenitor cells (HPC) and  
17 microglia in PMPs and Xeno MG, showing individual replicates (n=3 for PMP, n=4 averaged human  
18 clusters for Xeno MG). Color indicates the expression level normalized for each gene using a Z-score.  
19 (F) Principal component analysis (PCA) of our Xeno MG, hiPSC-derived PMPs, and individual cell  
20 RNA-seq expression data from publicly-available datasets, including hiPSC-derived microglia cultured  
21 under 2-dimensional (2D) conditions (iPS MG)<sup>17, 77</sup>, hiPSC-derived microglia developed in 3D cerebral  
22 organoids (oMG)<sup>78</sup>, hiPSC-derived microglia developed for 2-7.8 months in mouse brain (xMG)<sup>42</sup>.  
23 brain-tissue derived adult human microglia, including adult ex vivo microglia (Adult MG ExVivo) from  
24 Gosselin et al., 2017<sup>8</sup> (age from 13-17 years) and Galatro et al., 2017 (age from 34-102 years)<sup>12</sup>, in  
25 vitro microglia (MG InVitro) from Gosselin et al., 2017<sup>8</sup>, as well as blood/liver macrophages<sup>17, 77</sup>.  
26 (G) t-SNE plots of selected human cells showing the expression of *CD74*, *SPP1*, *C3*, *BAZ2B*, *CCL4*,  
27 *EGR2*, *EGR3*, and *CD83* gene transcripts. *CD74*, *SPP1*, *C3* and *BAZ2B* appear to be uniformly  
28 expressed in all cells, but *CCL4*, *EGR2*, *EGR3*, and *CD83* are enriched in distinct subsets of in Xeno  
29 MG.  
30

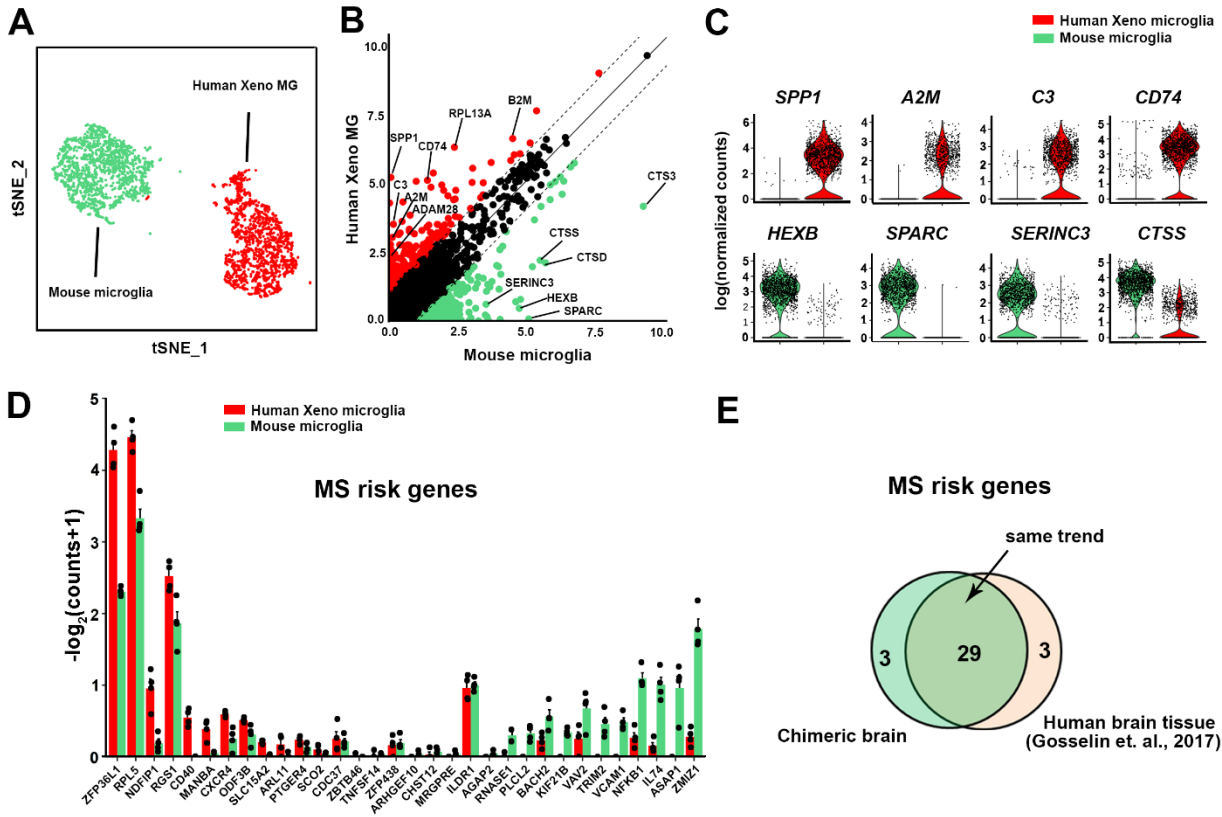

1 **Figure 5. Transcriptomic profiling analysis of clusters of Xeno MG and mouse microglia.**  
2 (A) tSNE plot highlighting only the clusters of human Xeno MG and mouse host microglia.  
3 (B) Scatter plot showing mean mRNA expression levels of human and mouse genes with unique  
4 orthologs from Xeno MG and mouse microglia clusters, highlighting the differentially expressed genes  
5 (DEGs; at least two-fold different) in human Xeno MG (red) or mouse microglia (green) from 6 months  
6 old chimeric mouse brain. Significantly different DEGs (less than 5% false discovery rate [FDR] and at  
7 least two-fold different) are listed in Table S2.  
8 (C) Violin plots summarizing expression differences in individual cells within the human Xeno MG and  
9 mouse microglia clusters. Dots indicate expression levels (as log normalized counts) of individual cells  
10 and the violin shape summarizes the distribution of expression in the population.  
11 (D) Bar plots showing the average expression (mean  $\pm$  SEM, n = 4 samples) of Multiple sclerosis (MS)-  
12 associated genes in Xeno MG and mouse microglia. These genes were reported to be differentially  
13 expressed between human and mouse microglia as in Gosselin et al., 2017<sup>8</sup>.  
14 (E) Venn diagrams showing that majority of the MS associated genes that were reported to be  
15 differentially expressed between human and mouse microglia are recapitulated in our chimeric mouse  
16 model (29 of 32).  
17

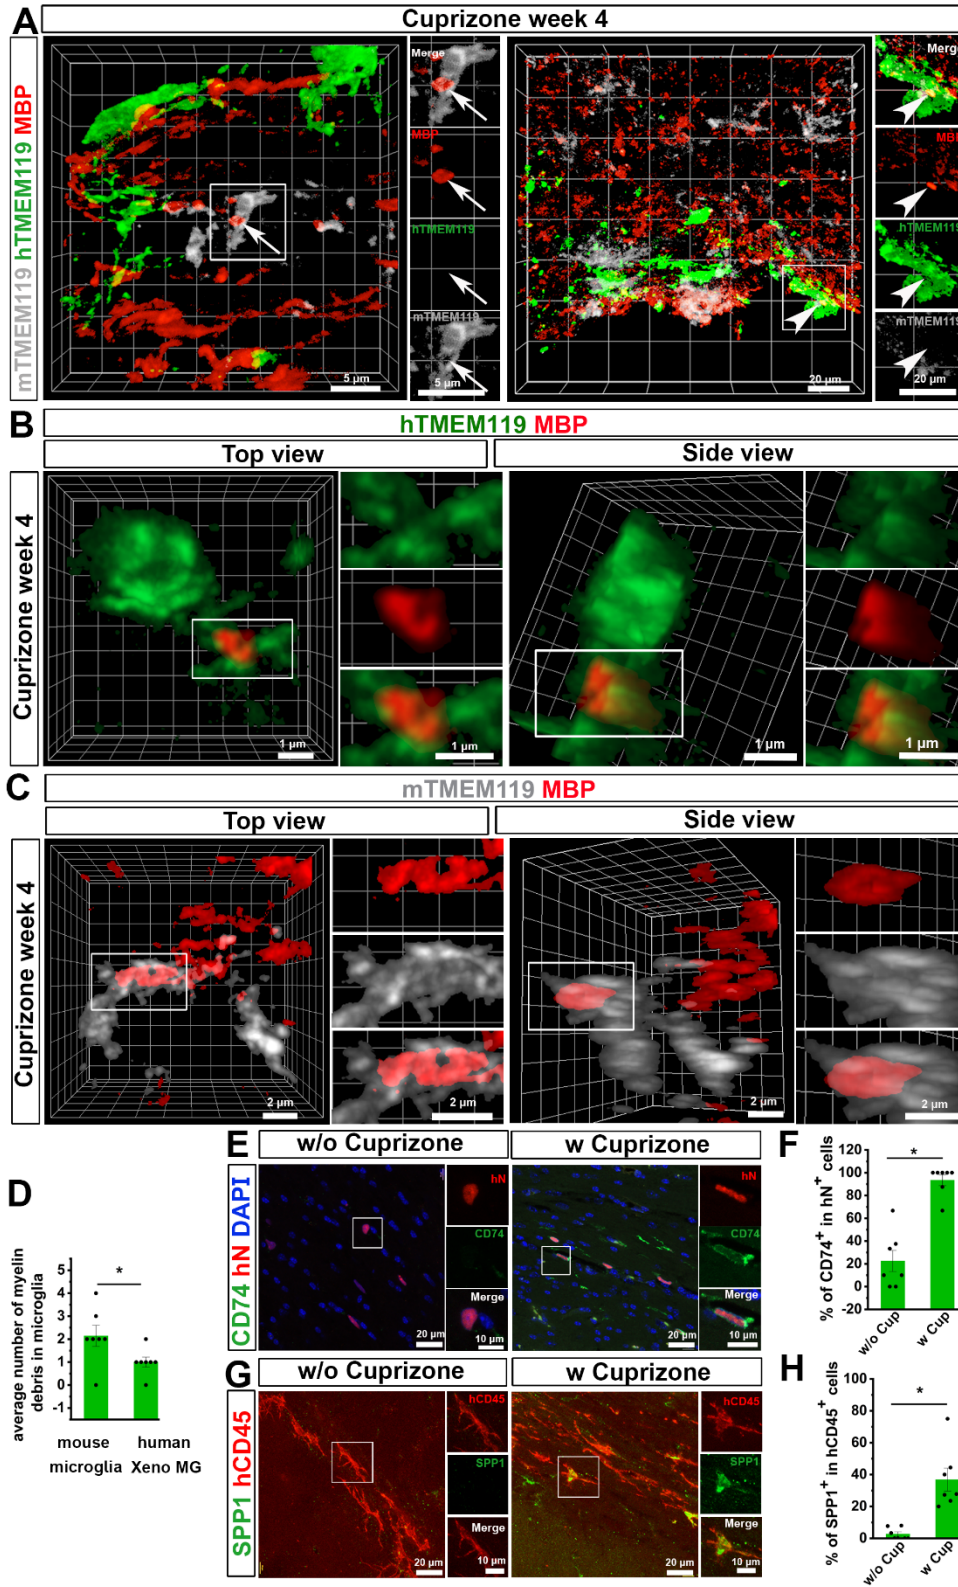

1 **Figure 6. Responses of hPSC-derived microglia to cuprizone-induced demyelination.**  
2 (A) Representative 3D reconstruction images showing hTMEM119<sup>+</sup> donor-derived microglia and  
3 mTMEM119<sup>+</sup> mouse host microglia interact with MBP<sup>+</sup> myelin debris in the corpus callosum after 4  
4 weeks of cuprizone-diet. Scale bars, 5 or 20  $\mu\text{m}$  in the original or enlarged images as indicated.  
5 (B and C) Representative 3D reconstruction of super-resolution images showing hTMEM119<sup>+</sup> donor-  
6 derived microglia (B) and mTMEM119<sup>+</sup> mouse host microglia (C) engulf MBP<sup>+</sup> myelin debris in the  
7 corpus callosum after 4 weeks of cuprizone-diet. Scale bars, 1  $\mu\text{m}$  in the original or enlarged images.  
8 (D) Quantification of average number of myelin debris in mouse host microglia and human Xeno MG (n  
9 = 7 mice). The data are pooled from the mice that received transplantation of microglia derived from  
10 both hESCs and hiPSCs. Student's *t* test. \**P* < 0.05. Data are presented as mean  $\pm$  s.e.m.  
11 (E) Representative images showing CD74<sup>+</sup> and hN<sup>+</sup> cells after 4 weeks of diet with (w) or without (w/o)  
12 cuprizone. Scale bars, 20 and 10  $\mu\text{m}$  in the original or enlarged images, respectively.  
13 (F) Quantification of the percentage of CD74<sup>+</sup> cells in total hN<sup>+</sup> cells after 4 weeks of diet with (w) or  
14 without (w/o) cuprizone (n = 7 mice). The data are pooled from the mice that received transplantation of  
15 microglia derived from both hESCs and hiPSCs. Student's *t* test. \**P* < 0.05. Data are presented as  
16 mean  $\pm$  s.e.m.  
17 (G) Representative images showing SPP1<sup>+</sup> and hN<sup>+</sup> cells after 4 weeks of diet with (w) or without (w/o)  
18 cuprizone. Scale bars, 20 and 10  $\mu\text{m}$  in the original or enlarged images, respectively.  
19 (F) Quantification of the percentage of SPP1<sup>+</sup> cells in total hN<sup>+</sup> cells after 4 weeks of diet with (w) or  
20 without (w/o) cuprizone (n = 7 mice). The data are pooled from the mice that received transplantation of  
21 microglia derived from both hESCs and hiPSCs. Student's *t* test. \**P* < 0.05. Data are presented as  
22 mean  $\pm$  s.e.m.

## References:

- 1 1. Li, Q. & Barres, B.A. Microglia and macrophages in brain homeostasis and disease. *Nat Rev Immunol* **18**, 225-242 (2018).
- 2 2. Casano, A.M. & Peri, F. Microglia: multitasking specialists of the brain. *Dev Cell* **32**, 469-477
- 3 (2015).
- 4 3. Keren-Shaul, H. et al. A Unique Microglia Type Associated with Restricting Development of
- 5 Alzheimer's Disease. *Cell* **169**, 1276-1290 e1217 (2017).
- 6 4. Hong, S. et al. Complement and microglia mediate early synapse loss in Alzheimer mouse
- 7 models. *Science* **352**, 712-716 (2016).
- 8 5. Yeh, F.L., Wang, Y., Tom, I., Gonzalez, L.C. & Sheng, M. TREM2 Binds to Apolipoproteins,
- 9 Including APOE and CLU/APOJ, and Thereby Facilitates Uptake of Amyloid-Beta by
- 10 Microglia. *Neuron* **91**, 328-340 (2016).
- 11 6. Venegas, C. et al. Microglia-derived ASC specks cross-seed amyloid-beta in Alzheimer's
- 12 disease. *Nature* **552**, 355-361 (2017).
- 13 7. Fuhrmann, M. et al. Microglial Cx3cr1 knockout prevents neuron loss in a mouse model of
- 14 Alzheimer's disease. *Nat Neurosci* **13**, 411-413 (2010).
- 15 8. Gosselin, D. et al. An environment-dependent transcriptional network specifies human
- 16 microglia identity. *Science* **356** (2017).
- 17 9. Hansen, D.V., Hanson, J.E. & Sheng, M. Microglia in Alzheimer's disease. *The Journal of cell*
- 18 *biology* **217**, 459-472 (2018).
- 19 10. Holtman, I.R., Skola, D. & Glass, C.K. Transcriptional control of microglia phenotypes in
- 20 health and disease. *J Clin Invest* **127**, 3220-3229 (2017).
- 21 11. Smith, A.M. & Draganow, M. The human side of microglia. *Trends Neurosci* **37**, 125-135
- 22 (2014).
- 23 12. Galatro, T.F. et al. Transcriptomic analysis of purified human cortical microglia reveals age-
- 24 associated changes. *Nat Neurosci* **20**, 1162-1171 (2017).
- 25 13. Friedman, B.A. et al. Diverse Brain Myeloid Expression Profiles Reveal Distinct Microglial
- 26 Activation States and Aspects of Alzheimer's Disease Not Evident in Mouse Models. *Cell Rep*
- 27 **22**, 832-847 (2018).
- 28 14. Muffat, J. et al. Efficient derivation of microglia-like cells from human pluripotent stem cells.
- 29 *Nat Med* **22**, 1358-1367 (2016).
- 30 15. Pandya, H. et al. Differentiation of human and murine induced pluripotent stem cells to
- 31 microglia-like cells. *Nat Neurosci* **20**, 753-759 (2017).
- 32 16. Abud, E.M. et al. iPSC-Derived Human Microglia-like Cells to Study Neurological Diseases.
- 33 *Neuron* **94**, 278-293 e279 (2017).
- 34 17. Douvaras, P. et al. Directed Differentiation of Human Pluripotent Stem Cells to Microglia.
- 35 *Stem Cell Reports* **8**, 1516-1524 (2017).
- 36 18. Haenseler, W. et al. A Highly Efficient Human Pluripotent Stem Cell Microglia Model
- 37 Displays a Neuronal-Co-culture-Specific Expression Profile and Inflammatory Response.
- 38 *Stem Cell Reports* **8**, 1727-1742 (2017).
- 39 19. Brownjohn, P.W. et al. Functional Studies of Missense TREM2 Mutations in Human Stem
- 40 Cell-Derived Microglia. *Stem Cell Reports* **10**, 1294-1307 (2018).
- 41 20. Olah, M. et al. A transcriptomic atlas of aged human microglia. *Nat Commun* **9**, 539 (2018).
- 42 21. Chen, C., Kim, W.Y. & Jiang, P. Humanized neuronal chimeric mouse brain generated by
- 43 neonatally engrafted human iPSC-derived primitive neural progenitor cells. *JCI Insight* **1**,
- 44 e88632 (2016).
- 45
- 46

- 1 22. Xu, R. et al. OLIG2 Drives Abnormal Neurodevelopmental Phenotypes in Human iPSC-Based  
2 Organoid and Chimeric Mouse Models of Down Syndrome. *Cell Stem Cell* **24**, 908-926 e908  
3 (2019).
- 4 23. Windrem, M.S. et al. Human iPSC Glial Mouse Chimeras Reveal Glial Contributions to  
5 Schizophrenia. *Cell Stem Cell* **21**, 195-208 e196 (2017).
- 6 24. Han, X. et al. Forebrain engraftment by human glial progenitor cells enhances synaptic  
7 plasticity and learning in adult mice. *Cell Stem Cell* **12**, 342-353 (2013).
- 8 25. Chen, H. et al. Human-derived neural progenitors functionally replace astrocytes in adult  
9 mice. *J Clin Invest* **125**, 1033-1042 (2015).
- 10 26. van Wilgenburg, B., Browne, C., Vowles, J. & Cowley, S.A. Efficient, long term production of  
11 monocyte-derived macrophages from human pluripotent stem cells under partly-defined  
12 and fully-defined conditions. *PLoS One* **8**, e71098 (2013).
- 13 27. Buchrieser, J., James, W. & Moore, M.D. Human Induced Pluripotent Stem Cell-Derived  
14 Macrophages Share Ontogeny with MYB-Independent Tissue-Resident Macrophages. *Stem  
15 Cell Reports* **8**, 334-345 (2017).
- 16 28. Claes, C., Van den Daele, J. & Verfaillie, C.M. Generating tissue-resident macrophages from  
17 pluripotent stem cells: Lessons learned from microglia. *Cell Immunol* **330**, 60-67 (2018).
- 18 29. Sturgeon, C.M., Ditadi, A., Awong, G., Kennedy, M. & Keller, G. Wnt signaling controls the  
19 specification of definitive and primitive hematopoiesis from human pluripotent stem cells.  
20 *Nat Biotechnol* **32**, 554-561 (2014).
- 21 30. Rathinam, C. et al. Efficient differentiation and function of human macrophages in  
22 humanized CSF-1 mice. *Blood* **118**, 3119-3128 (2011).
- 23 31. Hasselmann, J. et al. Development of a Chimeric Model to Study and Manipulate Human  
24 Microglia In Vivo. *Neuron* (2019).
- 25 32. Bennett, M.L. et al. New tools for studying microglia in the mouse and human CNS. *Proc Natl  
26 Acad Sci U S A* **113**, E1738-1746 (2016).
- 27 33. Forrester, J.V., McMenamin, P.G. & Dando, S.J. CNS infection and immune privilege. *Nat Rev  
28 Neurosci* **19**, 655-671 (2018).
- 29 34. Kettenmann, H., Hanisch, U.K., Noda, M. & Verkhratsky, A. Physiology of microglia. *Physiol  
30 Rev* **91**, 461-553 (2011).
- 31 35. McKercher, S.R. et al. Targeted disruption of the PU.1 gene results in multiple  
32 hematopoietic abnormalities. *EMBO J* **15**, 5647-5658 (1996).
- 33 36. Kim, E.M., Manzar, G. & Zavazava, N. Human iPSC cell-derived hematopoietic progenitor cells  
34 induce T-cell anergy in in vitro-generated alloreactive CD8(+) T cells. *Blood* **121**, 5167-  
35 5175 (2013).
- 36 37. Smith, A.M. et al. The transcription factor PU.1 is critical for viability and function of human  
37 brain microglia. *Glia* **61**, 929-942 (2013).
- 38 38. Feng, R. et al. PU.1 and C/EBPalpha/beta convert fibroblasts into macrophage-like cells.  
39 *Proc Natl Acad Sci U S A* **105**, 6057-6062 (2008).
- 40 39. Ford, A.L., Goodsall, A.L., Hickey, W.F. & Sedgwick, J.D. Normal adult ramified microglia  
41 separated from other central nervous system macrophages by flow cytometric sorting.  
42 Phenotypic differences defined and direct ex vivo antigen presentation to myelin basic  
43 protein-reactive CD4+ T cells compared. *J Immunol* **154**, 4309-4321 (1995).
- 44 40. Pirzgalska, R.M. et al. Sympathetic neuron-associated macrophages contribute to obesity by  
45 importing and metabolizing norepinephrine. *Nat Med* **23**, 1309-1318 (2017).

- 1 41. Goldmann, T. et al. Origin, fate and dynamics of macrophages at central nervous system  
2 interfaces. *Nat Immunol* **17**, 797-805 (2016).
- 3 42. Hasselmann, J. et al. Development of a Chimeric Model to Study and Manipulate Human  
4 Microglia In Vivo. *Neuron* **103**, 1016-1033 e1010 (2019).
- 5 43. Eriksdotter-Nilsson, M., Bjorklund, H. & Olson, L. Laminin immunohistochemistry: a simple  
6 method to visualize and quantitate vascular structures in the mammalian brain. *J Neurosci*  
7 *Methods* **17**, 275-286 (1986).
- 8 44. Raj, D.D. et al. Priming of microglia in a DNA-repair deficient model of accelerated aging.  
9 *Neurobiol Aging* **35**, 2147-2160 (2014).
- 10 45. Lawson, L.J., Perry, V.H., Dri, P. & Gordon, S. Heterogeneity in the distribution and  
11 morphology of microglia in the normal adult mouse brain. *Neuroscience* **39**, 151-170  
12 (1990).
- 13 46. Marsh, S.E. et al. The adaptive immune system restrains Alzheimer's disease pathogenesis  
14 by modulating microglial function. *Proc Natl Acad Sci U S A* **113**, E1316-1325 (2016).
- 15 47. Hanisch, U.K. & Kettenmann, H. Microglia: active sensor and versatile effector cells in the  
16 normal and pathologic brain. *Nat Neurosci* **10**, 1387-1394 (2007).
- 17 48. Colonna, M. & Butovsky, O. Microglia Function in the Central Nervous System During Health  
18 and Neurodegeneration. *Annu Rev Immunol* **35**, 441-468 (2017).
- 19 49. Weinhard, L. et al. Microglia remodel synapses by presynaptic trogocytosis and spine head  
20 filopodia induction. *Nat Commun* **9**, 1228 (2018).
- 21 50. DeFalco, T., Bhattacharya, I., Williams, A.V., Sams, D.M. & Capel, B. Yolk-sac-derived  
22 macrophages regulate fetal testis vascularization and morphogenesis. *Proc Natl Acad Sci U*  
23 *S A* **111**, E2384-2393 (2014).
- 24 51. Paolicelli, R.C. et al. Synaptic pruning by microglia is necessary for normal brain  
25 development. *Science* **333**, 1456-1458 (2011).
- 26 52. Schafer, D.P. & Stevens, B. Microglia Function in Central Nervous System Development and  
27 Plasticity. *Cold Spring Harb Perspect Biol* **7**, a020545 (2015).
- 28 53. Li, Q.Y. et al. Developmental Heterogeneity of Microglia and Brain Myeloid Cells Revealed  
29 by Deep Single-Cell RNA Sequencing. *Neuron* **101**, 207-+ (2019).
- 30 54. Zlokovic, B.V. The blood-brain barrier in health and chronic neurodegenerative disorders.  
31 *Neuron* **57**, 178-201 (2008).
- 32 55. da Fonseca, A.C. et al. The impact of microglial activation on blood-brain barrier in brain  
33 diseases. *Front Cell Neurosci* **8**, 362 (2014).
- 34 56. Dudvarski Stankovic, N., Teodorczyk, M., Ploen, R., Zipp, F. & Schmidt, M.H.H. Microglia-  
35 blood vessel interactions: a double-edged sword in brain pathologies. *Acta*  
36 *neuropathologica* **131**, 347-363 (2016).
- 37 57. Zhang, Y. et al. Purification and Characterization of Progenitor and Mature Human  
38 Astrocytes Reveals Transcriptional and Functional Differences with Mouse. *Neuron* **89**, 37-  
39 53 (2016).
- 40 58. Dulken, B.W., Leeman, D.S., Boutet, S.C., Hebestreit, K. & Brunet, A. Single-Cell  
41 Transcriptomic Analysis Defines Heterogeneity and Transcriptional Dynamics in the Adult  
42 Neural Stem Cell Lineage. *Cell Rep* **18**, 777-790 (2017).
- 43 59. Tkachev, D. et al. Oligodendrocyte dysfunction in schizophrenia and bipolar disorder.  
44 *Lancet* **362**, 798-805 (2003).



- 1 60. Lee, J., Gravel, M., Zhang, R., Thibault, P. & Braun, P.E. Process outgrowth in  
2 oligodendrocytes is mediated by CNP, a novel microtubule assembly myelin protein. *The*  
3 *Journal of cell biology* **170**, 661-673 (2005).
- 4 61. Wang, S. et al. Human iPSC-derived oligodendrocyte progenitor cells can myelinate and  
5 rescue a mouse model of congenital hypomyelination. *Cell Stem Cell* **12**, 252-264 (2013).
- 6 62. Liu, M.L. et al. Small molecules enable neurogenin 2 to efficiently convert human fibroblasts  
7 into cholinergic neurons. *Nat Commun* **4**, 2183 (2013).
- 8 63. Sherriff, F.E., Bridges, L.R., Gentleman, S.M., Sivaloganathan, S. & Wilson, S. Markers of  
9 axonal injury in post mortem human brain. *Acta neuropathologica* **88**, 433-439 (1994).
- 10 64. Bergsland, M., Werme, M., Malewicz, M., Perlmann, T. & Muhr, J. The establishment of  
11 neuronal properties is controlled by Sox4 and Sox11. *Genes Dev* **20**, 3475-3486 (2006).
- 12 65. Fuzik, J. et al. Integration of electrophysiological recordings with single-cell RNA-seq data  
13 identifies neuronal subtypes. *Nat Biotechnol* **34**, 175-183 (2016).
- 14 66. Sweeney, M.D., Kisler, K., Montagne, A., Toga, A.W. & Zlokovic, B.V. The role of brain  
15 vasculature in neurodegenerative disorders. *Nat Neurosci* **21**, 1318-1331 (2018).
- 16 67. Bostrom, K.I. Cell differentiation in vascular calcification. *Z Kardiol* **89 Suppl 2**, 69-74  
17 (2000).
- 18 68. Marques, F. et al. Lipocalin 2 is a choroid plexus acute-phase protein. *J Cereb Blood Flow*  
19 *Metab* **28**, 450-455 (2008).
- 20 69. Marques, F. et al. Transcriptome signature of the adult mouse choroid plexus. *Fluids*  
21 *Barriers CNS* **8**, 10 (2011).
- 22 70. Arneson, D. et al. Single cell molecular alterations reveal target cells and pathways of  
23 concussive brain injury. *Nat Commun* **9**, 3894 (2018).
- 24 71. Daneman, R. et al. The mouse blood-brain barrier transcriptome: a new resource for  
25 understanding the development and function of brain endothelial cells. *PLoS One* **5**, e13741  
26 (2010).
- 27 72. Tremblay, R., Lee, S. & Rudy, B. GABAergic Interneurons in the Neocortex: From Cellular  
28 Properties to Circuits. *Neuron* **91**, 260-292 (2016).
- 29 73. Hu, J.S. et al. Coup-TF1 and Coup-TF2 control subtype and laminar identity of MGE-derived  
30 neocortical interneurons. *Development* **144**, 2837-2851 (2017).
- 31 74. Pan, J.Z. et al. Cytokine activity contributes to induction of inflammatory cytokine mRNAs in  
32 spinal cord following contusion. *J Neurosci Res* **68**, 315-322 (2002).
- 33 75. Feghali, C.A. & Wright, T.M. Cytokines in acute and chronic inflammation. *Front Biosci* **2**,  
34 d12-26 (1997).
- 35 76. Turner, M.D., Nedjai, B., Hurst, T. & Pennington, D.J. Cytokines and chemokines: At the  
36 crossroads of cell signalling and inflammatory disease. *Biochim Biophys Acta* **1843**, 2563-  
37 2582 (2014).
- 38 77. Yamamizu, K. et al. In Vitro Modeling of Blood-Brain Barrier with Human iPSC-Derived  
39 Endothelial Cells, Pericytes, Neurons, and Astrocytes via Notch Signaling. *Stem Cell Reports*  
40 **8**, 634-647 (2017).
- 41 78. Ormel, P.R. et al. Microglia innately develop within cerebral organoids. *Nat Commun* **9**,  
42 4167 (2018).
- 43 79. Masuda, T. et al. Spatial and temporal heterogeneity of mouse and human microglia at  
44 single-cell resolution. *Nature* **566**, 388-392 (2019).
- 45 80. Wolf, S.A., Boddeke, H.W. & Kettenmann, H. Microglia in Physiology and Disease. *Annu Rev*  
46 *Physiol* **79**, 619-643 (2017).

- 1 81. Butovsky, O. & Weiner, H.L. Microglial signatures and their role in health and disease. *Nat*
- 2 *Rev Neurosci* **19**, 622-635 (2018).
- 3 82. Blakemore, W.F. & Franklin, R.J. Remyelination in experimental models of toxin-induced
- 4 demyelination. *Curr Top Microbiol Immunol* **318**, 193-212 (2008).
- 5 83. Masuda, T. et al. Spatial and temporal heterogeneity of mouse and human microglia at
- 6 single-cell resolution. *Nature* **566**, 388-392 (2019).
- 7 84. Kwan, K.Y. et al. Species-dependent posttranscriptional regulation of NOS1 by FMRP in the
- 8 developing cerebral cortex. *Cell* **149**, 899-911 (2012).
- 9 85. Kraushar, M.L. et al. Temporally defined neocortical translation and polysome assembly are
- 10 determined by the RNA-binding protein Hu antigen R. *Proc Natl Acad Sci U S A* **111**, E3815-
- 11 3824 (2014).
- 12 86. Ito, R., Takahashi, T. & Ito, M. Humanized mouse models: Application to human diseases. *J*
- 13 *Cell Physiol* **233**, 3723-3728 (2018).
- 14 87. Askew, K. et al. Coupled Proliferation and Apoptosis Maintain the Rapid Turnover of
- 15 Microglia in the Adult Brain. *Cell Rep* **18**, 391-405 (2017).
- 16 88. Tay, T.L. et al. A new fate mapping system reveals context-dependent random or clonal
- 17 expansion of microglia. *Nat Neurosci* **20**, 793-803 (2017).
- 18 89. Reu, P. et al. The Lifespan and Turnover of Microglia in the Human Brain. *Cell Rep* **20**, 779-
- 19 784 (2017).
- 20 90. Windrem, M.S. et al. A competitive advantage by neonatally engrafted human glial
- 21 progenitors yields mice whose brains are chimeric for human glia. *J Neurosci* **34**, 16153-
- 22 16161 (2014).
- 23 91. Xu, R. et al. Reversing Abnormal Neural Development by Inhibiting OLIG2 in Down
- 24 Syndrome Human iPSC Brain Organoids and Neuronal Mouse Chimeras. *BioRxiv* (2018).
- 25 92. McQuade, A. et al. Development and validation of a simplified method to generate human
- 26 microglia from pluripotent stem cells. *Mol Neurodegener* **13**, 67 (2018).
- 27 93. Mancuso, R. et al. Stem cell derived human microglia transplanted in mouse brain to study
- 28 genetic risk of Alzheimer's Disease. *bioRxiv* <https://doi.org/10.1101/562561>, 562561
- 29 (2019).
- 30 94. Stevens, B. et al. The classical complement cascade mediates CNS synapse elimination. *Cell*
- 31 **131**, 1164-1178 (2007).
- 32 95. Cunningham, C.L., Martinez-Cerdeno, V. & Noctor, S.C. Microglia regulate the number of
- 33 neural precursor cells in the developing cerebral cortex. *J Neurosci* **33**, 4216-4233 (2013).
- 34 96. Thion, M.S., Ginhoux, F. & Garel, S. Microglia and early brain development: An intimate
- 35 journey. *Science* **362**, 185-189 (2018).
- 36 97. Elmore, M.R. et al. Colony-stimulating factor 1 receptor signaling is necessary for microglia
- 37 viability, unmasking a microglia progenitor cell in the adult brain. *Neuron* **82**, 380-397
- 38 (2014).
- 39 98. Gowing, G., Vallieres, L. & Julien, J.P. Mouse model for ablation of proliferating microglia in
- 40 acute CNS injuries. *Glia* **53**, 331-337 (2006).
- 41 99. Lan, P., Tonomura, N., Shimizu, A., Wang, S. & Yang, Y.G. Reconstitution of a functional
- 42 human immune system in immunodeficient mice through combined human fetal
- 43 thymus/liver and CD34+ cell transplantation. *Blood* **108**, 487-492 (2006).
- 44 100. Slukvin, II Hematopoietic specification from human pluripotent stem cells: current
- 45 advances and challenges toward de novo generation of hematopoietic stem cells. *Blood*
- 46 **122**, 4035-4046 (2013).

- 1 101. Chen, C. et al. Role of astroglia in Down's syndrome revealed by patient-derived human-  
2 induced pluripotent stem cells. *Nat Commun* **5**, 4430 (2014).
- 3 102. Muller, F.J. et al. A bioinformatic assay for pluripotency in human cells. *Nat Methods* **8**, 315-  
4 317 (2011).
- 5 103. Fulmer, C.G. et al. Astrocyte-derived BDNF supports myelin protein synthesis after  
6 cuprizone-induced demyelination. *J Neurosci* **34**, 8186-8196 (2014).
- 7 104. Marques, S. et al. Oligodendrocyte heterogeneity in the mouse juvenile and adult central  
8 nervous system. *Science* **352**, 1326-1329 (2016).
- 9 105. Butler, A. & Satija, R. Integrated analysis of single cell transcriptomic data across  
10 conditions, technologies, and species. *bioRxiv*, 164889 (2017).
- 11 106. Macosko, E.Z. et al. Highly Parallel Genome-wide Expression Profiling of Individual Cells  
12 Using Nanoliter Droplets. *Cell* **161**, 1202-1214 (2015).
- 13 107. Satija, R., Farrell, J.A., Gennert, D., Schier, A.F. & Regev, A. Spatial reconstruction of single-  
14 cell gene expression data. *Nat Biotechnol* **33**, 495-502 (2015).
- 15 108. Gentleman, R.C. et al. Bioconductor: open software development for computational biology  
16 and bioinformatics. *Genome Biol* **5**, R80 (2004).
- 17 109. Butler, A., Hoffman, P., Smibert, P., Papalexi, E. & Satija, R. Integrating single-cell  
18 transcriptomic data across different conditions, technologies, and species. *Nat Biotechnol*  
19 **36**, 411-420 (2018).
- 20 110. Hart, R.P. Strategies for Integrating Single-Cell RNA Sequencing Results With Multiple  
21 Species. *bioRxiv*, 671115 (2019).
- 22 111. Reimand, J. et al. g:Profiler-a web server for functional interpretation of gene lists (2016  
23 update). *Nucleic Acids Res* **44**, W83-89 (2016).
- 24 112. Kim, D., Langmead, B. & Salzberg, S.L. HISAT: a fast spliced aligner with low memory  
25 requirements. *Nature methods* **12**, 357-360 (2015).
- 26 113. Love, M.I., Huber, W. & Anders, S. Moderated estimation of fold change and dispersion for  
27 RNA-seq data with DESeq2. *Genome Biol* **15**, 550 (2014).
- 28 114. Pasca, A.M. et al. Functional cortical neurons and astrocytes from human pluripotent stem  
29 cells in 3D culture. *Nat Methods* **12**, 671-678 (2015).
- 30 115. Liu, Y., Jiang, P. & Deng, W. OLIG gene targeting in human pluripotent stem cells for motor  
31 neuron and oligodendrocyte differentiation. *Nat Protoc* **6**, 640-655 (2011).
- 32 116. Young, K. & Morrison, H. Quantifying Microglia Morphology from Photomicrographs of  
33 Immunohistochemistry Prepared Tissue Using ImageJ. *J Vis Exp* (2018).
- 34
